# Supplementary material
Source: PubMed Central journal article supplement (PMC2946850)
Supplement: NIHMS235904-supplement-1_si_001.pdf [file NIHMS235904-supplement-1_si_001.pdf]

# Supporting Information

## Palladium-Catalyzed Suzuki–Miyaura Cross-Coupling Reactions of Enantiomerically enriched Potassium $\beta$ - Trifluoroboratoamides with Various Aryl- and Hetaryl Chlorides

Gary A. Molander\*, Inji Shin and Ludivine Jean-Gérard

*Roy and Diana A. Vagelos Laboratories, Department of Chemistry, University of  
Pennsylvania, Philadelphia, Pennsylvania 19104-6323*

### Contents:

|                                                                                                                       |     |
|-----------------------------------------------------------------------------------------------------------------------|-----|
| General Considerations.....                                                                                           | S2  |
| General Procedure for the Alkylation Reaction.....                                                                    | S3  |
| General Procedure for the Preparation of Enantiomerically Enriched Potassium<br>Trifluoroboratoamidohomoenolates..... | S6  |
| General Procedure for the Suzuki–Miyaura Cross-coupling Reaction.....                                                 | S9  |
| References.....                                                                                                       | S26 |
| NMR.....                                                                                                              | S27 |

**General.**

Pd(OAc)<sub>2</sub>, RuPhos, SPhos and K<sub>2</sub>CO<sub>3</sub> were used as received. All halides were used as received. Lithium chloride was dried under vacuum at 150 °C for 24 h prior to use. Toluene was distilled from sodium/benzophenone prior to use. H<sub>2</sub>O was degassed prior to use. Melting points (°C) are uncorrected. <sup>1</sup>H, <sup>13</sup>C and <sup>19</sup>F NMR spectra were recorded at 500.39, 125.75, and 470.55 MHz, respectively. <sup>19</sup>F NMR chemical shifts were referenced to external CFC<sub>3</sub> (0.0 ppm). <sup>11</sup>B NMR spectra at 128.4 MHz were obtained on a spectrometer equipped with the appropriate decoupling accessories. All <sup>11</sup>B NMR chemical shifts were referenced to external BF<sub>3</sub>•OEt<sub>2</sub> (0.0 ppm) with a negative sign indicating an upfield shift. Analytical thin layer chromatography (TLC) was performed on TLC silica gel plates (0.25 mm) precoated with a fluorescent indicator. Standard flash chromatography procedures were followed using 32–63 μm silica gel. Visualization was effected with ultraviolet light, cerium ammonium molybdate (CAM), and KMnO<sub>4</sub>.

## General Procedure for the Alkylation Reaction.

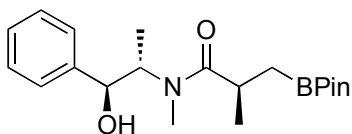

**(R)-N-((1S,2S)-1-Hydroxy-1-phenylpropan-2-yl)-N,2-dimethyl-3-(4,4,5,5-tetramethyl-1,3,2-dioxaborolan-2-yl)propanamide (5a).** A flame-dried round bottom flask was charged with LiCl (1.1 g, 27.1 mmol, 6.0 equiv), *i*-Pr<sub>2</sub>NH (1.5 mL, 10.6 mmol, 2.4 equiv), and THF (13 mL). The solution was cooled to  $-78\text{ }^{\circ}\text{C}$ , and added to a solution of *n*-BuLi in hexanes (2.5 M, 4.4 mL, 9.5 mmol, 2.1 equiv). The resulting mixture was briefly warmed to  $0\text{ }^{\circ}\text{C}$  and cooled to  $-78\text{ }^{\circ}\text{C}$  again. A cooled solution of amide **4a** (1.0 g, 4.5 mmol, 1.0 equiv) in THF (15 mL) was added to the reaction flask. The mixture was stirred at  $-78\text{ }^{\circ}\text{C}$  for 1 h, at  $0\text{ }^{\circ}\text{C}$  for 15 min, and at rt for 5 min and then cooled to  $0\text{ }^{\circ}\text{C}$ . Iodomethylpinacolboronate (1.8 g, 6.75 mmol, 1.5 equiv) was added to reaction mixture and stirred at  $0\text{ }^{\circ}\text{C}$  for 30 min, and then the reaction was quenched by the addition of saturated aq. NH<sub>4</sub>Cl solution (10 mL). The mixture was extracted with EtOAc (2  $\times$  30 mL) and brine (10 mL). The organic layer was dried (MgSO<sub>4</sub>), concentrated in vacuo, and purified by column chromatography (hexane:EtOAc = 1:1) to afford the product **5a** (1.4 g, 3.9 mmol) as a colorless oil in 86% yield.  $[\alpha]_{\text{D}}^{20} +60.8$  (c 1.20, CHCl<sub>3</sub>); <sup>1</sup>H NMR (1.2:1 rotamer ratio, asterisk denotes minor rotamer peaks, 500 MHz, C<sub>6</sub>D<sub>6</sub>)  $\delta$  7.39–7.06 (m, 5H), 4.72 (br, 1H), 4.42 (d, *J* = 9.0 Hz, 1H), 4.14\* (d, *J* = 1.5 Hz, 1H), 4.12–4.02\* (m, 1H), 4.02–3.94 (m, 1H), 3.34–3.27 (m, 1H), 2.77 (s, 3H), 2.69–2.63\* (m, 1H), 2.37\* (s, 3H), 1.71 (dd, *J* = 16.0, 10.0 Hz, 1H), 1.25 (dd, 1H, *J* = 15.5, 7.0 Hz, 1H), 1.14\* (s, 12H), 1.12–1.11 (m, 15H), 1.03 (d, 3H, *J* = 7.0 Hz, 3H), 0.60\* (d, 3H, *J* = 6.5 Hz, 3H); <sup>13</sup>C NMR (125.6 MHz, CDCl<sub>3</sub>) 179.7\*, 178.8, 128.8, 142.5\*, 141.1, 128.6, 128.3\*, 128.1\*, 127.5\*, 127.1, 126.6, 83.2\*, 82.9, 76.2\*, 75.5, 58.8, 33.1\*, 32.3, 26.9, 25.9,

24.7\*, 24.5, 20.3, 19.4\*, 15.8, 14.2\*;  $^{11}\text{B}$  NMR (128.4 MHz,  $\text{C}_6\text{D}_6$ )  $\delta$  31.8; IR (neat) 3369, 2976, 1617  $\text{cm}^{-1}$ ; HRMS (ES+) calcd. for  $\text{C}_{20}\text{H}_{32}\text{BNO}_4\text{Na}$   $[\text{M}+\text{Na}]^+$  383.2322, found 383.2314.

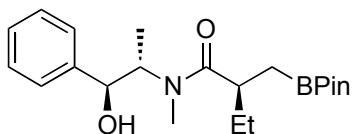

**(S)-N-((1S,2S)-1-Hydroxy-1-phenylpropan-2-yl)-N-methyl-2-((4,4,5,5-tetramethyl-1,3,2-dioxaborolan-2-yl)methyl)butanamide (5b).** The reaction was carried out with amide **4b** (4.1 g, 17.4 mmol, 1.0 equiv) according to the general alkylation procedure to obtain **5b** (6.5 g, 17.2 mmol) as a colorless oil in 99% yield.  $[\alpha]_{\text{D}}^{20} +72.0$  (c 1.54,  $\text{CHCl}_3$ );  $^1\text{H}$  NMR (1:1 rotamer ratio, asterisk denotes minor rotamer peaks, 500 MHz,  $\text{C}_6\text{D}_6$ )  $\delta$  7.39 (t,  $J = 8.0$  Hz, 2H), 7.22–7.06 (m, 3H), 4.80–4.74 (m, 1H), 4.71\* (br, 1H), 4.42 (d,  $J = 9.0$  Hz, 1H), 4.11–4.02 (m, 1H), 3.27–3.18\* (m, 1H), 2.80 (s, 3H), 2.62–2.53 (m, 1H), 2.45\* (s, 3H), 1.84–1.73 (m, 1H), 1.70–1.62\* (dd,  $J = 16.0, 10.0$  Hz, 1H), 1.61–1.40 (m, 2H), 1.32–1.25 (m, 1H), 1.13\* (d,  $J = 10.5$  Hz, 12H), 1.10 (s, 12H), 1.08 (d,  $J = 7.0$  Hz, 3H), 0.86\* (t,  $J = 7.5$  Hz, 3H), 0.81 (t,  $J = 7.5$  Hz, 3H), 0.64\* (d,  $J = 7.0$  Hz, 3H);  $^{13}\text{C}$  NMR (125.6 MHz,  $\text{CDCl}_3$ )  $\delta$  179.2\*, 178.2, 142.6\*, 141.2, 128.7, 128.4, 128.2\*, 127.7\*, 127.2, 126.8\*, 83.5, 83.1\*, 78.4\*, 75.7, 59.0, 39.7\*, 38.8, 28.0, 27.7\*, 26.9, 25.0, 24.8\*, 24.6, 16.1, 14.5\*, 11.9\*, 11.9;  $^{11}\text{B}$  NMR (128.4 MHz,  $\text{C}_6\text{D}_6$ )  $\delta$  31.9; IR (neat) 3435, 1638  $\text{cm}^{-1}$ ; HRMS (ES+) calcd. for  $\text{C}_{21}\text{H}_{35}\text{NO}_4$   $[\text{M}+\text{H}]^+$  376.2659, found 376.2653.

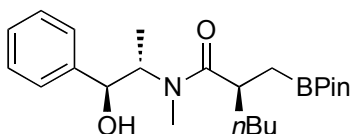

**(S)-N-((1S,2S)-1-Hydroxy-1-phenylpropan-2-yl)-N-methyl-2-((4,4,5,5-tetramethyl-1,3,2-dioxaborolan-2-yl)methyl)hexanamide (5c).** The reaction was carried out with amide **4c** (1.1 g, 4.18 mmol, 1.0 equiv) according to the general alkylation procedure to obtain **5c** (1.4 g, 3.47 mmol) as a colorless oil in 83% yield.  $[\alpha]_D^{20} +61.8$  (c 1.23, CHCl<sub>3</sub>); <sup>1</sup>H NMR (1:1 rotamer ratio, asterisk denotes minor rotamer peaks, 500 MHz, C<sub>6</sub>D<sub>6</sub>) δ 7.39 (dd, *J* = 7.0, 5.0 Hz, 2H), 7.22–7.07 (m, 3H), 4.77\* (s, 1H), 4.46 (d, *J* = 9.0 Hz, 1H), 4.36 (s, 1H), 4.18–4.08 (m, 1H), 3.36–3.28\* (m, 1H), 2.82 (s, 3H), 2.72–2.63 (m, 1H), 2.51\* (s, 3H), 1.82–1.73\* (m, 1H), 1.65 (dd, *J* = 16.0, 10.0 Hz, 1H), 1.60–1.43 (m, 2H), 1.32–1.17 (m, 5H), 1.14\* (d, *J* = 10.0 Hz, 12H), 1.11 (s, 12H), 0.87\* (t, *J* = 7.0 Hz, 3H), 0.76 (t, *J* = 7.0 Hz, 3H), 1.37 (d, *J* = 7.0 Hz, 3H); <sup>13</sup>C NMR (125.6 MHz, CDCl<sub>3</sub>) δ 179.4\*, 178.4, 142.7\*, 141.3, 128.7, 128.4, 128.3\*, 127.7\*, 127.3, 126.8\*, 83.5, 83.2\*, 76.5\*, 75.8, 59.0, 38.2\*, 37.1, 34.7, 34.5\*, 29.7\*, 29.4, 26.9, 25.0, 24.8\*, 24.6, 22.9\*, 22.7, 16.1, 14.5\*, 14.1\*, 14.0; <sup>11</sup>B NMR (128.4 MHz, C<sub>6</sub>D<sub>6</sub>) δ 31.7; IR (neat) 3436, 1634 cm<sup>-1</sup>; HRMS (ES+) calcd. for C<sub>23</sub>H<sub>39</sub>NO<sub>4</sub>B [M+H]<sup>+</sup> 404.2972, found 404.2984.

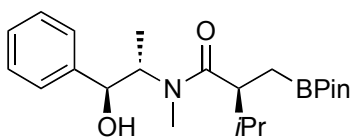

**(R)-N-((1S,2S)-1-Hydroxy-1-phenylpropan-2-yl)-N,3-dimethyl-2-((4,4,5,5-tetramethyl-1,3,2-dioxaborolan-2-yl)methyl)butanamide (5d).** The reaction was carried out with amide **4d** (1.4 g, 5.62 mmol, 1 equiv) according to the general alkylation procedure to obtain **5d** (1.5 g, 3.85 mmol) as a colorless oil in 69% yield.  $[\alpha]_D^{20} +73.5$  (c 2.04, CHCl<sub>3</sub>); <sup>1</sup>H NMR (1:1 rotamer ratio, asterisk denotes minor rotamer peaks, 500 MHz, C<sub>6</sub>D<sub>6</sub>) δ 7.40 (dd, *J* = 15.0, 7.5 Hz, 2H), 7.23–7.07 (m, 3H), 4.83–4.78\* (m, 1H),

4.76\* (s, 1H), 4.47 (d,  $J = 8.0$  Hz, 2H), 4.18–4.08 (m, 1H), 3.25–3.19\* (m, 1H), 2.80 (s, 3H), 2.56\* (s, 3H), 2.55–2.47 (m, 1H), 2.08–1.99\* (m, 1H), 1.89–1.78 (m, 1H), 1.70–1.61\* (m, 1H), 1.35\* (dd,  $J = 16.0, 9.0$  Hz, 1H), 1.12\* (d,  $J = 14.0$  Hz, 12H), 1.10 (s, 12H), 1.00 (ddd,  $J = 21.0, 16.5, 5.0$  Hz, 2H), 0.89 (dd,  $J = 11.5, 6.5$  Hz, 6H), 0.83 (d,  $J = 7.0$  Hz, 3H), 0.66\* (d,  $J = 6.5$  Hz, 3H);  $^{13}\text{C}$  NMR (125.6 MHz,  $\text{CDCl}_3$ )  $\delta$  178.8\*, 177.6, 142.6\*, 141.2, 128.7, 128.3, 128.1\*, 127.6\*, 127.2, 126.8\*, 83.5, 83.1\*, 76.4\*, 75.7, 59.1, 44.4\*, 43.0, 31.7, 31.5\*, 26.8\*, 24.9, 24.7\*, 24.5, 21.5, 21.1\*, 19.0\*, 18.5, 16.2, 14.3\*;  $^{11}\text{B}$  NMR (128.4 MHz,  $\text{C}_6\text{D}_6$ )  $\delta$  32.3; IR (neat) 3435, 1620  $\text{cm}^{-1}$ ; HRMS (ES+) calcd. for  $\text{C}_{22}\text{H}_{37}\text{NO}_4\text{B}$   $[\text{M}+\text{H}]^+$  390.2816, found 390.2797.

**General Procedure for the Preparation of Chiral Potassium Trifluoroboratoamidohomoenolates.**

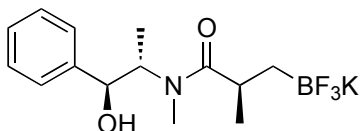

**Potassium (*R*)-3-(Trifluoroborato)-*N*-((1*S*,2*S*)-1-hydroxy-1-phenylpropan-2-yl)-*N*,2-dimethylpropanamide (**6a**).** Boronate ester **5a** (4.4 g, 12.2 mmol, 1.0 equiv) was dissolved in MeCN (24 mL) and cooled to 0 °C.  $\text{KHF}_2$  (2.9 g, 36.5 mmol, 3.0 equiv) in  $\text{H}_2\text{O}$  (8 mL) was added. The reaction mixture was stirred for 20 min at 0 °C. The solution was concentrated in vacuo and then dried in vacuo overnight. The crude mixture was extracted with acetone (2 × 20 mL), and the extracts were combined and concentrated.  $\text{Et}_2\text{O}$  (30 mL) was added to precipitate the product. The product **6a** (3.7 g, 11.0 mmol) was filtered and dried in vacuo and obtained as a white solid in 90% yield.  $[\alpha]_{\text{D}}^{20} +48.2$  (c 1.42, MeOH); mp: 124–129 °C;  $^1\text{H}$  NMR (2:1 rotamer ratio, asterisk denotes minor

rotamer peaks, presence of less than 5% of pinacol, 500 MHz, DMSO- $d_6$ )  $\delta$  7.47–7.19 (m, 5H), 5.31–5.18 (m, 1H), 5.07–4.99\* (m, 1H), 4.68–4.54 (m, 1H), 4.54–4.45 (m, 1H), 4.25–4.15\* (m, 1H), 2.82 (s, 3H), 2.70\* (s, 3H), 2.59–2.51 (m, 1H), 0.94\* (d,  $J$  = 6.0 Hz, 3H), 0.88 (d,  $J$  = 6.5 Hz, 3H), 0.79 (d,  $J$  = 6.5 Hz, 3H), 0.68–0.65\* (m, 1H), 0.23–0.12 (m, 1H), 0.07––0.11 (m, 1H);  $^{13}\text{C}$  NMR (125.6 MHz, DMSO- $d_6$ )  $\delta$  179.5, 179.4\*, 143.9, 143.8\*, 128.0\*, 127.8, 127.5\*, 127.3\*, 127.0, 126.9, 74.2, 74.0, 73.5\*, 56.2, 32.3, 32.0\*, 29.5\*, 26.0\*, 25.0, 20.0\*, 18.9, 15.4\*, 13.9;  $^{19}\text{F}$  NMR (470.8 MHz, DMSO- $d_6$ )  $\delta$  –135.2\*, –136.1;  $^{11}\text{B}$  NMR (128.4 MHz, DMSO- $d_6$ )  $\delta$  3.92; IR (KBr) 3505, 2970, 1615  $\text{cm}^{-1}$ ; HRMS (ES-) calcd. for  $\text{C}_{15}\text{H}_{22}\text{BNO}_2\text{F}_3$  [ $\text{M}-\text{K}$ ] $^-$  302.1539, found 302.1547.

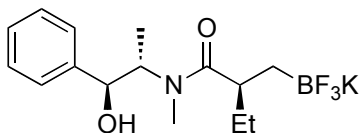

**Potassium (*S*)-2-((Trifluoroborato)methyl)-*N*-((1*S*,2*S*)-1-hydroxy-1-phenylpropan-2-yl)-*N*-methylbutanamide (**6b**).** The reaction was carried out with boronate ester **5b** (6.1 g, 16.3 mmol, 1.0 equiv) according to the general procedure for the preparation of chiral potassium trifluoroboratohomoenolates to obtain **6b** (4.2 g, 11.8 mmol) as a white solid in 72% yield.  $[\alpha]_{\text{D}}^{20} +52.3$  (c 1.21, MeOH); mp: 185–186 °C;  $^1\text{H}$  NMR (2:1 rotamer ratio, asterisk denotes minor rotamer peaks, 500 MHz, DMSO- $d_6$ )  $\delta$  7.63–7.29 (m, 5H), 5.36 (s, 1H), 5.03\* (s, 1H), 4.76 (br, 1H), 4.70–4.68 (m, 1H), 4.62–4.58\* (m, 1H), 4.39–4.38\* (m, 1H), 2.95 (s, 3H), 2.86\* (s, 3H), 2.65–2.57 (m, 1H), 1.67–1.55\* (m, 2H), 1.55–1.44 (m, 2H), 0.99 (d,  $J$  = 6.5 Hz, 3H), 0.92\* (d,  $J$  = 6.0 Hz, 3H), 0.77\* (t,  $J$  = 7.0 Hz, 3H), 0.70 (t,  $J$  = 7.0 Hz, 3H), 0.65–0.58\* (m, 1H), 0.30–0.18 (m, 1H), 0.18–0.07 (m, 1H);  $^{13}\text{C}$  NMR (125.6 MHz, DMSO- $d_6$ )  $\delta$  178.7, 178.5\*, 143.9, 143.8\*, 128.0, 127.8, 127.5\*, 127.3\*,

126.8\*, 126.7, 74.4\*, 74.1, 56.2, 53.5\*, 40.1, 30.2, 27.9, 26.8, 25.9\*, 15.5\*, 13.9, 12.9\*, 12.7;  $^{19}\text{F}$  NMR (470.8 MHz, DMSO- $d_6$ )  $\delta$  -134.9\*, -136.0;  $^{11}\text{B}$  NMR (128.4 MHz, DMSO- $d_6$ )  $\delta$  4.5; IR (KBr) 3504, 2968, 1611  $\text{cm}^{-1}$ ; HRMS (ES-) calcd. for  $\text{C}_{15}\text{H}_{22}\text{BNO}_2\text{F}_3$   $[\text{M}-\text{K}]^-$  316.1696, found 316.1707.

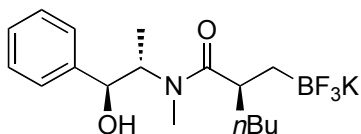

**Potassium (S)-2-((Trifluoroboryl)methyl)-N-((1S,2S)-1-hydroxy-1-phenylpropan-2-yl)-N-methylhexanamide (6c).** The reaction was carried out with boronate ester **5c** (1.2 g, 3.00 mmol, 1 equiv) according to the general procedure for the preparation of chiral potassium trifluoroborato-homoenolate to obtain **6c** (590 mg, 1.54 mmol) as a white solid in 61% yield.  $[\alpha]_D^{20}$  +44.9 (c 1.02, MeOH); mp: 64–68 °C;  $^1\text{H}$  NMR (2:1 rotamer ratio, asterisk denotes minor rotamer peaks, presence of less than 5% of pinacol, 500 MHz, DMSO- $d_6$ )  $\delta$  7.56–7.24 (m, 5H), 5.32 (s, 1H), 5.01–4.94\* (m, 1H), 4.76–4.66 (m, 1H), 4.66–4.59 (m, 1H), 4.57–4.49\* (m, 1H), 4.37–4.28\* (m, 1H), 2.88 (s, 3H), 2.80\* (s, 3H), 2.67–2.59\* (m, 1H), 2.57 (s, 1H), 1.62–1.37 (m, 2H), 1.36–1.17 (m, 2H), 1.11–0.97 (m, 2H), 0.95 (d,  $J$  = 6.5 Hz, 3H), 0.87 (dd,  $J$  = 14.0, 7.5 Hz, 3H), 0.65–0.53\* (m, 1H), 0.23–0.11 (m, 1H), 0.11–0.00 (m, 1H);  $^{13}\text{C}$  NMR (125.6 MHz, DMSO- $d_6$ )  $\delta$  178.9, 178.7\*, 143.9, 128.0, 127.7, 127.5\*, 127.3\*, 126.8\*, 126.7, 74.5, 74.2, 73.6\*, 56.3, 38.0, 34.8\*, 33.8, 30.4\*, 29.9, 26.0\*, 25.0, 22.6, 15.5\*, 14.1, 14.0\*, 13.9;  $^{19}\text{F}$  NMR (470.8 MHz, DMSO- $d_6$ )  $\delta$  -134.9\*, -136.0;  $^{11}\text{B}$  NMR (128.4 MHz, DMSO- $d_6$ )  $\delta$  4.19; IR (KBr) 3400, 2931, 1611  $\text{cm}^{-1}$ ; HRMS (ES-) calcd. for  $\text{C}_{17}\text{H}_{26}\text{BNO}_2\text{F}_3$   $[\text{M}-\text{K}]^-$  344.2009, found 344.2017.



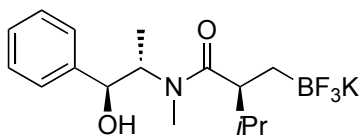

**Potassium (S)-2-((Trifluoroboryl)methyl)-N-((1S,2S)-1-hydroxy-1-phenylpropan-2-yl)-N,3-dimethylbutanamide (6d).** The reaction was carried out with boronate ester **5d** (1.3 g, 3.44 mmol, 1.0 equiv) according to the general procedure for the preparation of chiral potassium trifluoroborato-homoenolate to obtain **6d** (1.1 g, 2.98 mmol) as a white solid in 83% yield.  $[\alpha]_D^{20} +49.6$  (c 1.21, MeOH); mp: 70–75 °C;  $^1\text{H}$  NMR (3:2 rotamer ratio, asterisk denotes minor rotamer peaks, presence of less than 5% of pinacol, 500 MHz, DMSO- $d_6$ )  $\delta$  7.51–7.18 (m, 5H), 5.01 (s, 1H), 4.74–4.64\* (m, 1H), 4.61–4.48 (m, 2H), 4.45–4.38\* (m, 1H), 4.32–4.24\* (m, 1H), 2.85 (s, 3H), 2.71\* (s, 3H), 2.28–2.24\* (m, 1H), 2.24–2.17 (m, 1H), 1.64–1.54\* (m, 1H), 1.54–1.45 (m, 1H), 0.82 (ddd,  $J = 29.0, 14.0, 7.5$  Hz, 6H), 0.70\* (d,  $J = 6.5$  Hz, 3H), 0.64 (d,  $J = 7.0$  Hz, 3H), 0.34–0.26 (m, 1H), 0.22–0.06 (m, 1H);  $^{13}\text{C}$  NMR (125.6 MHz, DMSO- $d_6$ )  $\delta$  178.5, 178.3\*, 144.0\*, 143.9, 127.9, 127.7, 127.5\*, 127.2\*, 126.8, 74.9\*, 74.2, 56.5, 44.7, 44.4\*, 33.2\*, 32.4, 26.0, 24.9\*, 21.5\*, 21.0, 20.6\*, 20.5, 15.4\*, 13.7;  $^{19}\text{F}$  NMR (470.8 MHz, DMSO- $d_6$ )  $\delta$  –134.3\*, –135.9;  $^{11}\text{B}$  NMR (128.4 MHz, DMSO- $d_6$ )  $\delta$  3.58; IR (KBr) 3512, 2964, 1611  $\text{cm}^{-1}$ ; HRMS (ES-) calcd. for  $\text{C}_{16}\text{H}_{24}\text{BNO}_2\text{F}_3$   $[\text{M}-\text{K}]^-$  330.1852, found 330.1855.

### General Procedure for the Suzuki–Miyaura Cross-coupling Reaction.

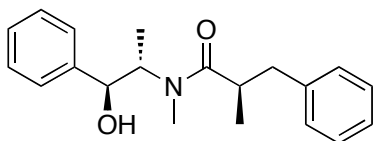

**(R)-N-((1S,2S)-1-Hydroxy-1-phenylpropan-2-yl)-N,2-dimethyl-3-**

**phenylpropanamide (7a).** The flask was charged with **6a** (90 mg, 0.263 mmol, 1.05 equiv), Pd(OAc)<sub>2</sub> (3 mg, 0.013 mmol, 0.05 equiv), RuPhos (12 mg, 0.03 mmol, 0.1 equiv) and K<sub>2</sub>CO<sub>3</sub> (104 mg, 0.75 mmol, 3.0 equiv) and then N<sub>2</sub> was purged 3 times. Chlorobenzene (32 mg, 0.25 mmol, 1.0 equiv) and toluene/H<sub>2</sub>O (4:1, 0.8 mL/0.2 mL) were added to the reaction flask. The reaction mixture was stirred for 22 h at 85 °C and then cooled to room temperature. A solution of pH 7 buffer (1 mL) was added, and the resulting mixture was extracted with EtOAc (2 × 3 mL). The organic layer was combined, dried (MgSO<sub>4</sub>) and filtered. The solvent was removed in vacuo and purified by column chromatography (hexane:EtOAc = 2:1) to afford the product **7a** (54 mg, 0.18 mmol) as a white solid in 70% yield. <sup>1</sup>H NMR (3:1 rotamer ratio, asterisk denotes minor rotamer peaks, 500 MHz, C<sub>6</sub>D<sub>6</sub>) δ 7.33–6.98 (m, 10H), 4.70 (br, 1H), 4.57–4.36 (m, 2H), 4.22\* (dd, *J* = 8.0, 3.0 Hz, 1H), 3.96–3.87\* (m, 1H), 3.39\* (dd, *J* = 13.5, 6.0 Hz, 1H), 3.01 (dd, *J* = 13.0, 8.0 Hz), 2.80\* (s, 3H), 2.65–2.55 (m, 1H), 2.39 (dd, *J* = 13.5, 6.5 Hz, 1H), 2.15 (s, 3H), 1.06\* (d, *J* = 6.5 Hz, 3H), 1.03 (d, *J* = 6.5 Hz, 3H), 0.83 (d, *J* = 6.0 Hz, 3H), 0.68\* (d, *J* = 7.0 Hz, 3H). Data is consistent with that reported in the literature.<sup>a</sup>

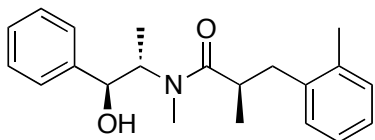

**(R)-N-((1S,2S)-1-Hydroxy-1-phenylpropan-2-yl)-N,2-dimethyl-3-(o-**

**tolyl)propanamide (7b).** The reaction was carried out with trifluoroborate **6a** (90 mg, 0.263 mmol, 1.05 equiv) and *o*-chlorotoluene (32 mg, 0.25 mmol, 1.0 equiv) according to the general Suzuki–Miyaura cross-coupling reaction procedure to obtain **7c** (33 mg, 0.1

mmol) as a colorless oil in 40% yield.  $[\alpha]_D^{20} +10.6$  (c 1.60,  $\text{CHCl}_3$ );  $^1\text{H}$  NMR (3:1 rotamer ratio, asterisk denotes minor rotamer peaks, 500 MHz,  $\text{C}_6\text{D}_6$ )  $\delta$  7.38–6.91 (m, 9H), 4.85 (br, 1H), 4.60 (br, 1H), 4.53 (d,  $J = 6.5$  Hz, 1H), 4.33\* (d,  $J = 8.5$  Hz, 1H), 4.00–3.92\* (m, 1H), 3.80\* (br, 1H), 3.39\* (dd,  $J = 13.5, 5.5$  Hz, 1H), 3.32–3.24\* (m, 1H), 3.00 (dd,  $J = 13.5, 8.0$  Hz, 1H), 2.94\* (dd,  $J = 13.5, 8.5$  Hz, 1H), 2.82\* (s, 3H), 2.74–2.70 (m, 1H), 2.59 (dd,  $J = 14.0, 6.0$  Hz, 1H), 2.38\* (s, 3H), 2.20 (s, 3H), 2.14 (s, 3H), 1.08 (d,  $J = 6.5$  Hz, 3H), 0.86 (d,  $J = 6.5$  Hz, 3H), 0.72\* (d,  $J = 7.0$  Hz, 3H);  $^{13}\text{C}$  NMR (125.6 MHz,  $\text{CDCl}_3$ )  $\delta$  178.5, 177.4\*, 142.5, 141.3\*, 138.6\*, 138.1, 136.5\*, 136.1, 130.4\*, 130.3, 130.1\*, 129.7, 128.7\*, 128.4, 127.6, 126.9\*, 126.5, 126.4, 126.4\*, 125.9, 76.5, 75.1\*, 58.3, 37.5, 37.2, 37.1\*, 36.6\*, 32.2, 27.1\*, 19.6\*, 19.5, 17.9\*, 17.7, 15.6\*, 14.3; IR (neat) 3370, 2972, 2933, 1618  $\text{cm}^{-1}$ ; HRMS (ES+) calcd. for  $\text{C}_{21}\text{H}_{28}\text{NO}_2$   $[\text{M}+\text{H}]^+$  326.2120, found 326.2115.

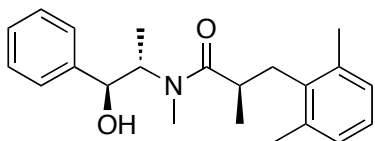

**(*R*)-3-(2,6-Dimethylphenyl)-*N*-((1*S*,2*S*)-1-hydroxy-1-phenylpropan-2-yl)-*N*,2-dimethylpropanamide (7c).** The reaction was carried out with trifluoroborate **6a** (90 mg, 0.263 mmol, 1.05 equiv) and 2,6-dimethyl-1-chlorobenzene (35 mg, 0.25 mmol, 1.0 equiv) according to the general Suzuki–Miyaura cross-coupling reaction procedure to obtain **7c** (32 mg, 0.09 mmol) as a colorless oil in 38% yield.  $[\alpha]_D^{20} -10.1$  (c 1.05,  $\text{CHCl}_3$ );  $^1\text{H}$  NMR (5:1 rotamer ratio, asterisk denotes minor rotamer peaks, 500 MHz,  $\text{C}_6\text{D}_6$ )  $\delta$  7.32–6.84 (m, 8H), 4.59 (br, 1H), 4.43 (d,  $J = 7.5$  Hz, 1H), 4.16\* (d,  $J = 9.0$  Hz, 1H), 3.87–3.78\* (m, 1H), 3.39–3.25\* (m, 2H), 3.19–3.10\* (m, 1H), 3.03 (dd,  $J = 14.0,$

8.5 Hz, 1H), 2.82–2.72 (m, 1H), 2.78\* (s, 3H), 2.68 (dd,  $J = 14.0, 6.0$  Hz, 1H), 2.42\* (s, 6H), 2.18 (s, 6H), 2.06 (s, 3H), 1.08 (d,  $J = 6.5$  Hz, 3H), 1.07\* (d,  $J = 6.5$  Hz, 3H), 0.79 (d,  $J = 7.0$  Hz, 3H), 0.60\* (d,  $J = 6.5$  Hz, 3H);  $^{13}\text{C}$  NMR (125.6 MHz,  $\text{CDCl}_3$ )  $\delta$  179.2, 142.5, 137.4\*, 137.0, 136.8, 128.8\*, 128.5\*, 128.5, 128.4, 127.8, 127.0\*, 126.6, 126.3, 76.7, 58.5, 36.2, 35.8\*, 34.0, 33.4\*, 29.8, 27.0\*, 20.6\*, 20.5, 17.8, 15.8\*, 14.4; IR (neat) 3369, 2929, 1617  $\text{cm}^{-1}$ ; HRMS (ES+) calcd. for  $\text{C}_{22}\text{H}_{30}\text{NO}_2$   $[\text{M}+\text{H}]^+$  340.2277, found 340.2275.

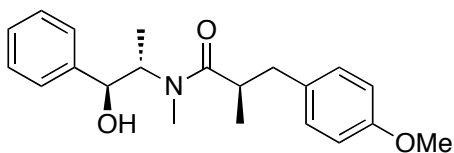

**(R)-N-((1S,2S)-1-Hydroxy-1-phenylpropan-2-yl)-3-(4-methoxyphenyl)-N,2-**

**dimethylpropanamide (7d).** The reaction was carried out with trifluoroborate **6a** (90 mg, 0.263 mmol, 1.05 equiv) and 4-chloroanisole (36 mg, 0.25 mmol, 1.0 equiv) according to the general Suzuki–Miyaura cross-coupling reaction procedure using SPhos to obtain **7d** (44 mg, 0.13 mmol) as a colorless oil in 51% yield.  $[\alpha]_{\text{D}}^{20} +18.1$  (c 1.38,  $\text{CHCl}_3$ );  $^1\text{H}$  NMR (3:1 rotamer ratio, asterisk denotes minor rotamer peaks, 500 MHz,  $\text{C}_6\text{D}_6$ )  $\delta$  7.37–6.71 (m, 9H), 4.96 (br, 1H), 4.60 (br, 1H), 4.53 (d,  $J = 7.5$  Hz, 1H), 4.41\* (d,  $J = 8.0$  Hz, 1H), 4.04–3.97\* (m, 1H), 3.35\* (s, 3H), 3.33 (s, 3H), 3.16–3.09\* (m, 1H), 2.97 (dd,  $J = 13.5, 8.5$  Hz, 1H), 2.84\* (s, 3H), 2.97\* (dd,  $J = 13.5, 9.0$  Hz, 1H), 2.68–2.60 (m, 1H), 2.47 (dd,  $J = 13.5, 6.0$  Hz, 1H), 2.26 (s, 3H), 1.07\* (d,  $J = 6.5$  Hz, 3H), 1.04 (d,  $J = 6.5$  Hz, 3H), 0.86 (d,  $J = 6.5$  Hz, 3H), 0.76\* (d,  $J = 7.0$  Hz, 3H);  $^{13}\text{C}$  NMR (125.6 MHz,  $\text{CDCl}_3$ )  $\delta$  178.3, 177.3\*, 158.1, 158.0\*, 142.4, 141.5\*, 132.6\*, 132.1, 130.2\*, 129.9, 128.6\*, 128.3, 128.2\*, 127.6, 127.0\*, 126.5, 113.8\*, 113.7, 76.4, 75.3\*, 58.0, 55.2,

39.5, 39.1, 38.2\*, 32.2, 27.3\*, 24.8\*, 17.5\*, 17.4, 15.5\*, 14.3; IR (neat) 3377, 2971, 1614  $\text{cm}^{-1}$ ; HRMS (ES+) calcd. for  $\text{C}_{21}\text{H}_{28}\text{NO}_3$   $[\text{M}+\text{H}]^+$  342.2069, found 342.2065.

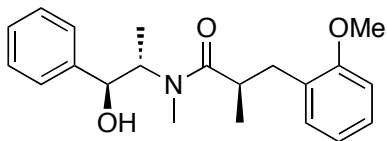

**(R)-N-((1S,2S)-1-Hydroxy-1-phenylpropan-2-yl)-3-(2-methoxyphenyl)-N,2-**

**dimethylpropanamide (7e).** The reaction was carried out with trifluoroborate **6a** (90 mg, 0.263 mmol, 1.05 equiv) and 2-chloroanisole (36 mg, 0.25 mmol, 1.0 equiv) according to the general Suzuki–Miyaura cross-coupling reaction procedure to obtain **7e** (47 mg, 0.14 mmol) as a colorless oil in 55% yield.  $[\alpha]_{\text{D}}^{20}$  2.6 (c 1.50,  $\text{CHCl}_3$ );  $^1\text{H}$  NMR (3:1 rotamer ratio, asterisk denotes minor rotamer peaks, 500 MHz,  $\text{C}_6\text{D}_6$ )  $\delta$  7.36–7.00 (m, 7H), 6.86\* (d,  $J = 7.5$  Hz, 1H), 6.78 (d,  $J = 7.0$  Hz, 1H), 6.60\* (d,  $J = 8.0$  Hz, 1H), 6.50 (d,  $J = 8.0$  Hz, 1H), 5.00 (br, 1H), 4.58–4.52 (m, 1H), 4.46–4.37 (m, 1H), 4.31\* (d,  $J = 7.5$  Hz, 1H), 4.20–4.12\* (m, 1H), 3.56\* (dd,  $J = 13.0, 6.0$  Hz, 1H), 3.42\* (s, 3H), 3.28 (s, 3H), 3.05–2.95 (m, 2H) (m, 1H), 2.84–2.75 (m, 1H), 2.78\* (s, 3H), 2.34 (s, 3H), 1.12 (d,  $J = 6.0$  Hz, 3H), 0.91 (d,  $J = 6.5$  Hz, 3H), 0.69\* (d,  $J = 6.5$  Hz, 3H);  $^{13}\text{C}$  NMR (125.6 MHz,  $\text{CDCl}_3$ )  $\delta$  179.0, 177.7\*, 157.6\*, 157.5, 142.6, 141.3\*, 131.6\*, 131.3, 128.6, 128.0\*, 127.7, 127.5, 127.2\*, 126.5, 120.4, 110.3\*, 110.1, 76.5, 75.2\*, 58.9\*, 58.1, 55.3\*, 55.2, 36.1, 35.5, 35.4\*, 32.7, 26.8\*, 17.7\*, 17.1, 15.4\*, 14.4; IR (neat) 3370, 2970, 1616  $\text{cm}^{-1}$ ; HRMS (ES+) calcd. for  $\text{C}_{21}\text{H}_{28}\text{NO}_3$   $[\text{M}+\text{H}]^+$  342.2069, found 342.2075.

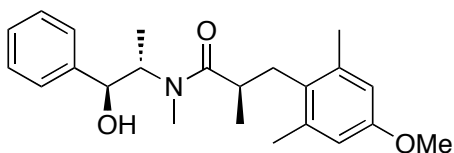

**(R)-N-((1S,2S)-1-Hydroxy-1-phenylpropan-2-yl)-3-(4-methoxy-2,6-dimethylphenyl)-N,2-dimethylpropanamide (7f).** The reaction was carried out with trifluoroborate **6a** (90 mg, 0.263 mmol, 1.05 equiv) and 2-chloro-5-methoxy-1,3-dimethylbenzene (43 mg, 0.25 mmol, 1.0 equiv) according to the general Suzuki–Miyaura cross-coupling reaction procedure to obtain **7f** (38 mg, 0.10 mmol) as a colorless oil in 41% yield.  $[\alpha]_D^{20} +0.6$  (c 0.69, CHCl<sub>3</sub>); <sup>1</sup>H NMR (3.5:1 rotamer ratio, asterisk denotes minor rotamer peaks, 500 MHz, C<sub>6</sub>D<sub>6</sub>) δ 7.33 (d, *J* = 7.5 Hz, 2H), 7.22–7.04 (m, 3H), 6.70\* (s, 2H), 6.57 (s, 2H), 4.66 (br, 2H), 4.48 (br, 1H), 4.28\* (d, *J* = 9.0 Hz, 1H), 3.93–3.85\* (m, 1H), 3.49–3.42\* (m, 1H), 3.40\* (s, 3H), 3.37 (s, 3H), 3.34–3.27\* (m, 2H), 3.00 (dd, *J* = 14.0, 8.5 Hz, 1H), 2.85\* (s, 3H), 2.81–2.74 (m, 1H), 2.65 (dd, *J* = 14.0, 6.0 Hz, 1H), 2.42\* (s, 6H), 2.18 (s, 6H), 2.13 (s, 3H), 1.13 (d, *J* = 6.5 Hz, 3H), 1.10\* (d, *J* = 6.5 Hz, 1H), 0.83 (d, *J* = 6.5 Hz, 3H), 0.65\* (d, *J* = 6.5 Hz, 3H); <sup>13</sup>C NMR (125.6 MHz, CDCl<sub>3</sub>) δ 179.1, 177.9\*, 157.5, 142.5, 141.4\*, 138.7\*, 138.2, 129.5, 129.0\*, 128.7\*, 128.4, 127.7, 126.9\*, 126.6, 113.7\*, 113.6, 76.6, 75.1\*, 58.4, 57.6\*, 55.1, 36.4, 36.0\*, 33.4, 32.5\*, 31.7, 27.0\*, 20.9\*, 20.7, 17.8\*, 17.7, 15.7\*, 14.4; IR (neat) 3381, 2966, 1616 cm<sup>-1</sup>; HRMS (ES+) calcd. for C<sub>23</sub>H<sub>31</sub>NO<sub>3</sub>Na [M+Na]<sup>+</sup> 392.2202, found 392.2199.

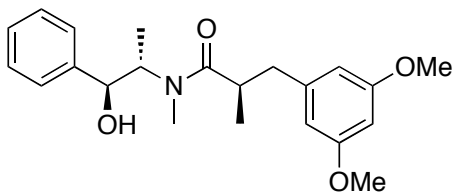

**(R)-3-(3,5-Dimethoxyphenyl)-N-((1S,2S)-1-hydroxy-1-phenylpropan-2-yl)-N,2-dimethylpropanamide (7g).** The reaction was carried out with trifluoroborate **6a** (90 mg, 0.263 mmol, 1.05 equiv) and 1-chloro-3,5-dimethoxybenzene (43 mg, 0.25 mmol, 1.0 equiv) according to the general Suzuki–Miyaura cross-coupling reaction procedure to

obtain **7g** (57 mg, 0.15 mmol) as a colorless oil in 62% yield.  $[\alpha]_D^{20} +26.4$  (c 2.25, CHCl<sub>3</sub>); <sup>1</sup>H NMR (3:1 rotamer ratio, asterisk denotes minor rotamer peaks, 500 MHz, C<sub>6</sub>D<sub>6</sub>) δ 7.40–6.34 (m, 8H), 4.60–4.48 (m, 1H), 4.50 (d, *J* = 7.0 Hz, 1H), 4.28\* (d, *J* = 8.5 Hz, 1H), 4.01–3.90\* (m, 1H), 3.43\* (s, 6H), 3.36 (s, 6H), 3.21–3.12\* (m, 1H), 3.04 (dd, *J* = 13.0, 8.5 Hz, 1H), 2.82\* (s, 3H), 2.75–2.64 (m, 1H), 2.51 (dd, *J* = 13.5, 6.0 Hz, 1H), 2.24 (s, 3H), 1.14\* (d, *J* = 7.0 Hz, 3H), 1.05 (d, *J* = 6.5 Hz, 3H), 0.79 (d, *J* = 6.0 Hz, 3H), 0.71\* (d, *J* = 6.5 Hz, 3H); <sup>13</sup>C NMR (125.6 MHz, CDCl<sub>3</sub>) δ 178.4, 177.2\*, 160.9\*, 160.8, 142.5, 142.5, 141.5\*, 128.7\*, 128.4, 127.7, 127.3\*, 127.0\*, 126.6, 107.3\*, 107.2, 98.4\*, 98.2, 77.4, 76.6, 75.5\*, 58.2\*, 55.4, 40.7, 40.5\*, 38.8, 38.0\*, 27.3\*, 25.0, 17.9\*, 17.6, 15.6\*, 14.5; IR (neat) 3370, 2971, 2930, 1607 cm<sup>-1</sup>; HRMS (ES<sup>+</sup>) calcd. for C<sub>22</sub>H<sub>29</sub>NO<sub>4</sub>Na [M+Na]<sup>+</sup> 394.1994, found 394.1993.

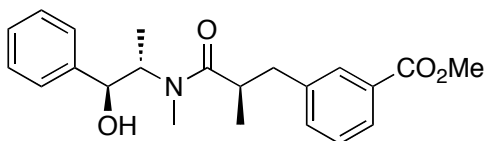

**Methyl 3-(((R)-3-(((1S,2S)-1-Hydroxy-1-phenylpropan-2-yl)(methyl)amino)-2-methyl-3-oxopropyl)benzoate (7h)** The reaction was carried out with trifluoroborate **6a** (90 mg, 0.263 mmol, 1.05 equiv) and methyl-3-chlorobenzoate (43 mg, 0.25 mmol, 1.0 equiv) according to the general Suzuki–Miyaura cross-coupling reaction procedure to obtain **7h** (53 mg, 0.14 mmol) as a colorless oil in 57% yield.  $[\alpha]_D^{20} +13.6$  (c 2.06, CHCl<sub>3</sub>); <sup>1</sup>H NMR (2.5:1 rotamer ratio, asterisk denotes minor rotamer peaks, 500 MHz, C<sub>6</sub>D<sub>6</sub>) δ 8.24–6.97 (m, 9H), 4.69 (br, 1H), 4.61 (br, 1H), 4.50 (d, *J* = 7.0 Hz, 1H), 4.36\* (d, *J* = 7.5 Hz, 1H), 3.98\* (br, 1H), 3.96–3.89\* (m, 1H), 3.53\* (s, 3H), 3.50 (s, 3H), 3.28\* (dd, *J* = 13.5 Hz, 5.5 Hz, 1H), 3.11–3.02\* (m, 1H), 2.99 (dd, *J* = 13.0 Hz, 8.5 Hz,

1H), 2.84\* (s, 3H), 2.79–2.71\* (m, 1H), 2.64–2.55 (m, 1H), 2.44 (dd,  $J = 13.5$  Hz, 5.5 Hz, 1H), 2.22 (s, 3H) 0.96 (d,  $J = 6.5$  Hz, 3H), 0.82 (d,  $J = 6.5$  Hz, 3H), 0.75\* (d,  $J = 7.0$  Hz, 3H);  $^{13}\text{C}$  NMR (125.6 MHz,  $\text{CDCl}_3$ )  $\delta$  177.5, 176.8\*, 167.3\*, 167.1, 142.3, 141.7\*, 140.9\*, 140.4, 130.3\*, 133.8, 130.1, 129.8, 128.6\*, 128.4, 128.2, 128.2\*, 128.0\*, 127.8\*, 127.5, 127.5, 127.3\*, 126.8\*, 126.4, 76.2, 75.3, 57.9, 57.4\*, 52.0, 39.9, 39.4\*, 38.6, 37.5\*, 31.9, 27.4\*, 17.4, 15.6\*, 14.2; IR (neat) 3401, 2974, 1720, 1618  $\text{cm}^{-1}$ ; HRMS (ES<sup>+</sup>) calcd. for  $\text{C}_{22}\text{H}_{27}\text{NO}_4\text{Na}$   $[\text{M}+\text{Na}]^+$  392.1838, found 392.1838.

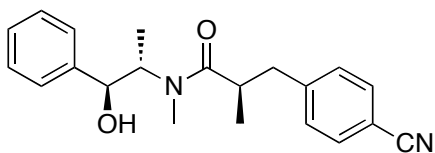

**(R)-3-(4-Cyanophenyl)-N-((1S,2S)-1-hydroxy-1-phenylpropan-2-yl)-N,2-dimethylpropanamide (7i).** The reaction was carried out with trifluoroborate **6a** (90 mg, 0.263 mmol, 1.05 equiv) and 4-chlorobenzonitrile (34 mg, 0.25 mmol, 1.0 equiv) according to the general Suzuki–Miyaura cross-coupling reaction procedure using SPhos to obtain **7i** (63 mg, 0.19 mmol) as a white solid in 75% yield.  $[\alpha]_{\text{D}}^{20} +27.8$  (c 1.29,  $\text{CHCl}_3$ ); mp: 140–142 °C;  $^1\text{H}$  NMR (3:1 rotamer ratio, asterisk denotes minor rotamer peaks, 500 MHz,  $\text{C}_6\text{D}_6$ )  $\delta$  7.35–6.76 (m, 9H), 4.53 (d,  $J = 6.5$  Hz, 1H), 4.48 (br, 1H), 4.23\* (d,  $J = 8.0$  Hz, 1H), 3.93–3.85\* (m, 1H), 3.29\* (dd,  $J = 13.5, 7.0$  Hz, 1H), 3.14–3.05\* (m, 1H), 2.93 (dd,  $J = 13.5, 8.5$  Hz, 1H), 2.84\* (s, 3H), 2.64\* (dd,  $J = 13.5, 6.5$  Hz, 1H), 2.52–2.43 (m, 1H), 2.33 (dd,  $J = 13.5, 6.0$  Hz, 1H), 2.22 (s, 3H), 1.02\* (d,  $J = 7.0$  Hz, 3H), 0.98 (d,  $J = 7.0$  Hz, 3H), 0.90 (d,  $J = 6.5$  Hz, 3H), 0.77\* (d,  $J = 6.5$  Hz, 3H);  $^{13}\text{C}$  NMR (125.6 MHz,  $\text{CDCl}_3$ )  $\delta$  177.0, 176.2\*, 146.5\*, 145.9, 142.2, 141.5\*, 132.1, 132.0\*, 130.1\*, 129.9, 128.7\*, 128.3, 127.7, 126.8\*, 126.4, 119.2\*, 119.0, 110.1, 109.7\*, 76.2,



75.2\*, 57.9, 40.1, 39.8\*, 38.5, 37.4\*, 32.2, 27.4\*, 17.7\*, 17.6, 15.6\*, 14.3; IR (neat) 3430, 1622 cm<sup>-1</sup>; HRMS (ES<sup>+</sup>) calcd. for C<sub>21</sub>H<sub>25</sub>N<sub>2</sub>O<sub>2</sub> [M+H]<sup>+</sup> 337.1916, found 337.1931.

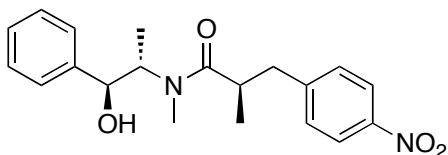

**(R)-N-((1S,2S)-1-Hydroxy-1-phenylpropan-2-yl)-N,2-dimethyl-3-(4-**

**nitrophenyl)propanamide (7j).** The reaction was carried out with trifluoroborate **6a** (90 mg, 0.263 mmol, 1.05 equiv) and 4-chloronitrobenzene (39 mg, 0.25 mmol, 1.0 equiv) according to the general Suzuki–Miyaura cross-coupling reaction procedure to obtain **7j** (67 mg, 0.19 mmol) as a yellow solid in 75% yield.  $[\alpha]_D^{20}$  +40.0 (c 1.01, CHCl<sub>3</sub>); mp: 161–164 °C; <sup>1</sup>H NMR (2:1 rotamer ratio, asterisk denotes minor rotamer peaks, 500 MHz, C<sub>6</sub>D<sub>6</sub>) δ 7.93\* (d, *J* = 8.5 Hz, 2H), 7.83 (d, *J* = 8.5 Hz, 2H), 7.30–7.03 (m, 5H), 6.73 (d, *J* = 8.0 Hz, 2H), 4.43 (br, 2H), 4.14\* (d, 8.0 Hz, 1H), 3.87–3.68\* (m, 1H), 3.22\* (dd, *J* = 13.5, 7.5 Hz, 1H), 3.09–3.00\* (m, 1H), 2.96 (br, 1H), 2.86 (dd, *J* = 13.5, 8.5 Hz, 1H), 2.74\* (s, 3H), 2.56\* (dd, *J* = 13.5, 6.5 Hz, 1H), 2.47–2.35 (m, 1H), 2.26 (dd, *J* = 13.5, 5.5 Hz, 1H), 2.15 (s, 3H), 0.93\* (d, *J* = 7.0 Hz, 3H), 0.89 (d, *J* = 7.0 Hz, 3H), 0.80 (d, *J* = 5.0 Hz, 3H), 0.68\* (d, *J* = 7.0 Hz, 3H); <sup>13</sup>C NMR (125.6 MHz, CDCl<sub>3</sub>) δ 177.1, 176.2\*, 148.7\*, 148.2, 146.7, 146.5\*, 142.3, 130.1\*, 129.9, 128.9\*, 128.6\*, 128.5, 127.8, 126.9\*, 126.4, 123.7, 123.5\*, 76.4, 75.4\*, 58.0, 39.9, 39.7\*, 38.7, 37.6\*, 32.4, 27.4\*, 18.0\*, 17.8, 15.7\*, 14.5; IR (neat) 3370, 2976, 2932, 1619, 1517, 1346 cm<sup>-1</sup>; HRMS (ES<sup>+</sup>) calcd. for C<sub>20</sub>H<sub>25</sub>N<sub>2</sub>O<sub>4</sub> [M+H]<sup>+</sup> 357.1814, found 357.1823.

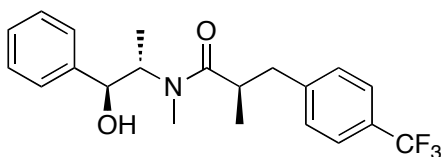

**(R)-N-((1S,2S)-1-Hydroxy-1-phenylpropan-2-yl)-N,2-dimethyl-3-(4-(trifluoromethyl)phenyl)propanamide (7k).** The reaction was carried out with trifluoroborate **6a** (90 mg, 0.263 mmol, 1.05 equiv) and 4-chlorobenzotrifluoride (45 mg, 0.25 mmol, 1.0 equiv) according to the general Suzuki–Miyaura cross-coupling reaction procedure to obtain **7k** (41 mg, 0.11 mmol) as a white solid in 43% yield.  $[\alpha]_D^{20} +11.0$  (c 1.10,  $\text{CHCl}_3$ ); mp: 118–120 °C;  $^1\text{H}$  NMR (3:1 rotamer ratio, asterisk denotes minor rotamer peaks, 500 MHz,  $\text{C}_6\text{D}_6$ )  $\delta$  7.42–6.85 (m, 9H), 4.63 (br, 1H), 4.55–4.40 (m, 1H), 4.45 (s, 1H), 4.27\* (d, 8.0 Hz, 1H), 3.94–3.84\* (m, 1H), 3.67\* (s, 1H), 3.09–3.00\* (m, 1H), 2.90 (dd,  $J = 13.5, 8.5$  Hz, 1H), 2.79\* (s, 3H), 2.67\* (dd,  $J = 13.5, 7.5$  Hz, 1H), 2.52–2.41 (m, 1H), 2.34 (dd,  $J = 13.0, 6.0$  Hz, 1H), 2.16 (s, 3H), 0.93 (d,  $J = 7.0$  Hz, 3H), 0.79 (d,  $J = 5.5$  Hz, 3H), 0.73\* (d,  $J = 6.5$  Hz, 3H);  $^{13}\text{C}$  NMR (125.6 MHz,  $\text{CDCl}_3$ )  $\delta$  177.4, 176.6\*, 144.9\*, 144.3, 142.3, 141.7\*, 129.6, 129.4\*, 129.3, 128.7, 128.4\*, 128.3, 127.6, 126.9\*, 126.4, 125.2 (q,  $J = 3.8$  Hz), 123.3\*, 76.2, 75.4\*, 57.9, 39.9, 39.5\*, 38.6, 37.5\*, 32.1, 27.5\*, 17.5, 17.5\*, 15.5\*, 14.2; IR (neat) 3380, 2976, 1619, 1326  $\text{cm}^{-1}$ ; HRMS (ES+) calcd. for  $\text{C}_{21}\text{H}_{24}\text{NO}_2\text{Na}$   $[\text{M}+\text{Na}]^+$  402.1657, found 402.1649.

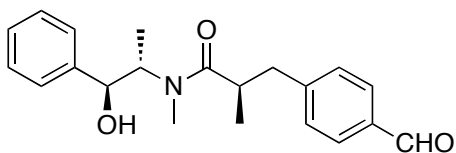

**(R)-3-(4-Formylphenyl)-N-((1S,2S)-1-hydroxy-1-phenylpropan-2-yl)-N,2-dimethylpropanamide (7l).** The reaction was carried out with trifluoroborate **6a** (90 mg, 0.263 mmol, 1.05 equiv) and 4-chlorobenzaldehyde (35 mg, 0.25 mmol, 1.0 equiv)

according to the general Suzuki–Miyaura cross-coupling reaction procedure to obtain **7i** (70 mg, 0.21 mmol) as a colorless oil in 82% yield.  $[\alpha]_D^{20} +35.7$  (c 1.71, CHCl<sub>3</sub>); <sup>1</sup>H NMR (3:1 rotamer ratio, asterisk denotes minor rotamer peaks, 500 MHz, C<sub>6</sub>D<sub>6</sub>) δ 9.71\* (s, 1H), 9.70 (s, 1H), 7.64–7.06 (m, 9H), 4.55–4.34 (br, 3H), 4.22\* (d, *J* = 8.0 Hz, 1H), 3.93–3.84\* (m, 1H), 3.31\* (dd, *J* = 13.5, 6.5 Hz, 1H), 3.16–3.07\* (m, 1H), 2.95 (dd, *J* = 13.0, 8.5 Hz, 1H), 2.78\* (s, 3H), 2.70\* (dd, *J* = 13.5, 7.5 Hz, 1H), 2.56–2.45 (m, 1H), 2.38 (dd, *J* = 13.5, 6.0 Hz, 1H), 2.16 (s, 3H), 0.98\* (d, *J* = 7.0 Hz, 3H), 0.95 (d, *J* = 6.5 Hz, 3H), 0.82 (d, *J* = 5.5 Hz, 3H), 0.70\* (d, *J* = 6.5 Hz, 3H); <sup>13</sup>C NMR (125.6 MHz, CDCl<sub>3</sub>) δ 192.2, 192.0\*, 177.5, 176.6\*, 148.3\*, 147.6, 142.3, 141.4\*, 134.89\*, 134.9, 130.0\*, 130.0\*, 129.9, 129.8, 128.8\*, 128.4, 128.3\*, 127.8, 126.9\*, 126.5, 76.4, 75.4\*, 58.1, 40.4, 40.0\*, 38.7, 37.7\*, 27.4, 17.8\*, 17.7, 15.7\*, 14.4; IR (neat) 3401, 1607 cm<sup>-1</sup>; HRMS (ES<sup>+</sup>) calcd. for C<sub>21</sub>H<sub>25</sub>NO<sub>3</sub>Na [M+Na]<sup>+</sup> 362.1732, found 362.1740.

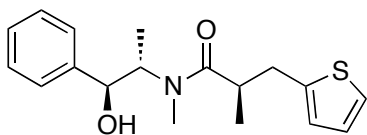

**(R)-N-((1S,2S)-1-Hydroxy-1-phenylpropan-2-yl)-N,2-dimethyl-3-(thiophen-2-yl)propanamide (8a).** The reaction was carried out with trifluoroborate **6a** (90 mg, 0.263 mmol, 1.05 equiv) and 2-chlorothiophene (30 mg, 0.25 mmol, 1.0 equiv) according to the general Suzuki–Miyaura cross-coupling reaction procedure to obtain **8a** (42 mg, 0.13 mmol) as a white solid in 53% yield.  $[\alpha]_D^{20} +25.6$  (c 0.80, CHCl<sub>3</sub>); mp: 100–103 °C; <sup>1</sup>H NMR (3:1 rotamer ratio, asterisk denotes minor rotamer peaks, 500 MHz, C<sub>6</sub>D<sub>6</sub>) δ 7.34–6.64 (m, 8H), 4.48 (s, 2H), 4.22\* (d, *J* = 8.0 Hz, 1H), 3.95–3.86\* (m, 1H), 4.00\* (dd, *J* = 14.5, 6.0 Hz, 1H), 3.26 (dd, *J* = 13.5, 7.5 Hz, 1H), 3.17–3.07\* (m, 1H), 3.04–2.95\* (m,

1H), 2.79\* (s, 3H), 2.71–2.57 (m, 2H), 2.24 (s, 3H), 1.33\* (d,  $J = 6.5$  Hz, 3H), 0.97 (d,  $J = 6.5$  Hz, 3H), 0.86 (d,  $J = 6.0$  Hz, 3H), 0.68\* (d,  $J = 6.5$  Hz, 3H);  $^{13}\text{C}$  NMR (125.6 MHz,  $\text{CDCl}_3$ )  $\delta$  177.8, 176.8\*, 143.1\*, 142.6, 142.4, 141.2\*, 128.8\*, 128.4, 127.7, 127.0\*, 127.0\*, 126.9, 126.6, 125.8\*, 125.6, 123.7\*, 123.6, 76.7, 75.5\*, 58.2, 39.6, 38.8\*, 34.2, 34.1\*, 32.5, 27.4\*, 17.7\*, 17.5, 15.6\*, 14.4 ; IR (neat) 3429, 1634  $\text{cm}^{-1}$ ; HRMS (ES+) calcd. for  $\text{C}_{18}\text{H}_{23}\text{NO}_2\text{SNa}$   $[\text{M}+\text{Na}]^+$  340.1347, found 340.1333.

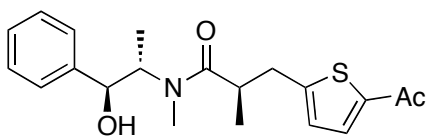

**(*R*)-3-(5-Acetylthiophen-2-yl)-*N*-((1*S*,2*S*)-1-hydroxy-1-phenylpropan-2-yl)-*N*,2-dimethylpropanamide (**8b**).** The reaction was carried out with trifluoroborate **6a** (90 mg, 0.263 mmol, 1.05 equiv) and 2-acetyl-5-chlorothiophene (40 mg, 0.25 mmol, 1.0 equiv) according to the general Suzuki–Miyaura cross-coupling reaction procedure to obtain **8b** (66 mg, 0.18 mmol) as a yellow oil in 73% yield.  $[\alpha]_{\text{D}}^{20} +47.3$  (c 1.04,  $\text{CHCl}_3$ );  $^1\text{H}$  NMR (2.5:1 rotamer ratio, asterisk denotes minor rotamer peaks, 500 MHz,  $\text{C}_6\text{D}_6$ )  $\delta$  7.39–6.97 (m, 6 H), 6.69\* (d,  $J = 3.5$  Hz, 1H), 6.56 (d,  $J = 3.5$  Hz, 1H), 4.46 (s, 2H), 4.30 (br, 1H), 4.22\* (d,  $J = 8.5$  Hz, 1H), 3.91–3.82\* (m, 1H), 3.37\* (dd,  $J = 14.5, 6.5$  Hz, 1H), 3.19 (dd,  $J = 13.5, 8.0$  Hz, 1H), 3.12–3.03\* (m, 1H), 2.88\* (dd,  $J = 14.5, 8.0$  Hz, 1H), 2.80\* (s, 3H), 2.61–2.51 (m, 1H), 2.50 (dd,  $J = 14.0, 5.5$  Hz, 1H), 2.25 (s, 3H), 2.07\* (s, 3H), 2.05 (s, 3H), 1.00\* (d,  $J = 7.0$  Hz, 3H), 0.89 (d,  $J = 6.5$  Hz, 3H), 0.87 (d,  $J = 6.5$  Hz, 3H), 0.71\* (d,  $J = 7.0$  Hz, 3H);  $^{13}\text{C}$  NMR (125.6 MHz,  $\text{CDCl}_3$ )  $\delta$  190.7\*, 190.6, 177.1, 176.2\*, 153.4\*, 152.8, 142.8, 142.7\*, 142.3, 141.3\*, 133.0\*, 132.9, 128.9\*, 128.5\*, 128.5, 127.8, 127.3\*, 127.2, 126.9\*, 126.5, 76.5, 75.6\*, 58.1, 39.3, 38.4\*, 34.8, 34.7\*, 43.4, 27.6\*, 26.6, 25.0\*, 17.7\*, 17.6, 15.7\*, 14.5 ;IR (neat) 3401, 2974, 2935,

1656, 1620  $\text{cm}^{-1}$ ; HRMS (ES<sup>+</sup>) calcd. for  $\text{C}_{20}\text{H}_{25}\text{NO}_3\text{SNa}$   $[\text{M}+\text{Na}]^+$  382.1453, found 382.1436.

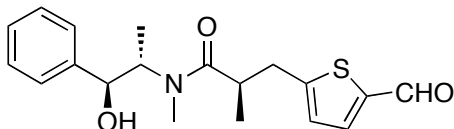

**(R)-3-(5-Formylthiophen-2-yl)-N-((1S,2S)-1-hydroxy-1-phenylpropan-2-yl)-N,2-**

**dimethylpropanamide (8c).** The reaction was carried out with trifluoroborate **6a** (90 mg, 0.263 mmol, 1.05 equiv) and 5-chlorothiophene-2-carboxaldehyde (37 mg, 0.25 mmol, 1.0 equiv) according to the general Suzuki–Miyaura cross-coupling reaction procedure to obtain **8c** (52 mg, 0.15 mmol) as a light yellow oil in 60% yield.  $[\alpha]_{\text{D}}^{20} +8.6$  (c 1.74,  $\text{CHCl}_3$ );  $^1\text{H}$  NMR (2:1 rotamer ratio, asterisk denotes minor rotamer peaks, 500 MHz,  $\text{C}_6\text{D}_6$ )  $\delta$  9.53\* (s, 1H), 9.50 (s, 1H), 7.40–7.04 (m, 5H), 7.01\* (d,  $J = 3.0$  Hz, 1H), 6.92 (d,  $J = 3.5$  Hz, 1H), 6.69\* (d,  $J = 3.0$  Hz, 1H), 6.92 (d,  $J = 3.0$  Hz, 1H), 4.51 (br, 1H), 4.48–4.42 (m, 1H), 4.30 (br, 1H), 4.25\* (d,  $J = 7.5$  Hz, 1H), 3.88–3.79\* (m, 1H), 3.45\* (br, 1H), 3.32\* (dd,  $J = 14.5, 6.5$  Hz, 1H), 3.15 (dd,  $J = 14.0, 8.5$  Hz, 1H), 3.08–2.99\* (m, 1H), 2.89–2.78\* (m, 1H), 2.81\* (s, 3H), 2.55–2.47 (m, 1H), 2.44 (dd,  $J = 14.5, 5.5$  Hz, 1H), 2.25 (s, 3H), 0.94\* (d,  $J = 6.5$  Hz, 3H), 0.84 (d,  $J = 6.0$  Hz, 6H), 0.73\* (d,  $J = 6.5$  Hz, 3H);  $^{13}\text{C}$  NMR (125.6 MHz,  $\text{CDCl}_3$ )  $\delta$  182.8\*, 182.8, 176.7, 175.9\*, 155.2\*, 154.6, 142.3, 141.5, 137.1\*, 137.0, 128.8\*, 128.4, 127.8, 127.5\*, 127.4, 126.8\*, 126.5, 76.4, 75.5\*, 58.0, 39.2, 38.2\*, 34.9, 34.8\*, 27.6\*, 25.0, 17.7\*, 17.6, 15.7\*, 14.4 ; IR (neat) 3411, 1661, 1620  $\text{cm}^{-1}$ ; HRMS (ES<sup>+</sup>) calcd. for  $\text{C}_{19}\text{H}_{24}\text{NO}_3\text{S}$   $[\text{M}+\text{H}]^+$  346.1477, found 346.1486.

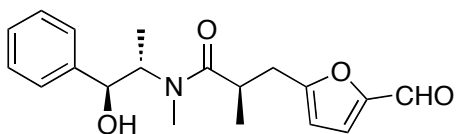

**(R)-3-(5-Formylfuran-2-yl)-N-((1S,2S)-1-hydroxy-1-phenylpropan-2-yl)-N,2-dimethylpropanamide (8d).** The reaction was carried out with trifluoroborate **6a** (90 mg, 0.263 mmol, 1.05 equiv) and 5-chloro-2-furaldehyde (33 mg, 0.25 mmol, 1.0 equiv) according to the general Suzuki–Miyaura cross-coupling reaction procedure to obtain **8d** (57 mg, 0.17 mmol) as a yellow oil in 69% yield.  $[\alpha]_D^{20} +21.5$  (c 1.43,  $\text{CHCl}_3$ );  $^1\text{H}$  NMR (2:1 rotamer ratio, asterisk denotes minor rotamer peaks, 500 MHz,  $\text{C}_6\text{D}_6$ )  $\delta$  9.82\* (s, 1H), 9.25 (s, 1H), 7.39–7.02 (m, 5H), 6.60\* (s, 1H), 6.53 (d,  $J = 3.0$  Hz, 1H), 6.01\* (d,  $J = 3.5$  Hz, 1H), 5.81 (d,  $J = 3.0$  Hz, 1H), 4.49 (br, 3H), 4.32\* (d,  $J = 8.5$  Hz, 1H), 3.99–3.89\* (m, 1H), 3.32–3.21 (m, 1H), 2.92 (dd,  $J = 14.5, 8.5$  Hz, 1H), 2.80\* (s, 3H), 2.77–2.70\* (m, 1H), 2.64\* (dd,  $J = 14.0, 6.5$  Hz, 1H), 2.41 (dd,  $J = 15.0, 6.0$  Hz, 1H), 2.31 (s, 3H), 0.94\* (d,  $J = 7.0$  Hz, 3H), 0.87 (d,  $J = 7.0$  Hz, 3H), 0.85 (d,  $J = 7.0$  Hz, 3H), 0.70\* (d,  $J = 7.0$  Hz, 3H);  $^{13}\text{C}$  NMR (125.6 MHz,  $\text{CDCl}_3$ )  $\delta$  176.9\*, 176.8, 176.7, 175.9\*, 162.2\*, 161.5, 152.0, 151.8\*, 142.3, 141.5\*, 128.8, 128.4, 128.3\*, 127.7\*, 127.6\*, 126.9, 126.4, 126.3\*, 110.3, 110.0\*, 76.2, 75.3\*, 58.2, 35.6, 34.8\*, 32.5, 27.3, 18.0\*, 17.4, 15.7\*, 14.3; IR (neat) 3412, 1636  $\text{cm}^{-1}$ ; HRMS (ES<sup>+</sup>) calcd. for  $\text{C}_{19}\text{H}_{23}\text{NO}_4\text{Na}$   $[\text{M}+\text{Na}]^+$  352.1525, found 352.1510.

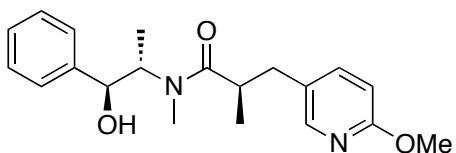

**(R)-N-((1S,2S)-1-Hydroxy-1-phenylpropan-2-yl)-3-(6-methoxypyridin-3-yl)-N,2-dimethylpropanamide (8e).** The reaction was carried out with trifluoroborate **6a** (90 mg,

0.263 mmol, 1.05 equiv) and 2-chloro-5-methoxypyridine (36 mg, 0.25 mmol, 1.0 equiv) according to the general Suzuki–Miyaura cross-coupling reaction procedure to obtain **8e** (47 mg, 0.14 mmol) as a light yellow oil in 55% yield.  $[\alpha]_D^{20} +26.3$  (c 1.70, CHCl<sub>3</sub>); <sup>1</sup>H NMR (3:1 rotamer ratio, asterisk denotes minor rotamer peaks, 500 MHz, C<sub>6</sub>D<sub>6</sub>) δ 8.23\* (d, *J* = 2.0 Hz, 1H), 8.03 (d, *J* = 2.5 Hz, 1H), 7.40–7.03 (m, 6H), 6.67\* (d, *J* = 8.5 Hz, 1H), 6.58 (d, *J* = 8.5 Hz, 1H), 4.69 (br, 1H), 4.75–4.50 (m, 1H), 4.48 (d, *J* = 7.0 Hz, 1H), 4.27\* (d, 1H, *J* = 8.0 Hz, 1H), 3.93–3.86\* (m, 1H), 3.82 (s, 3H), 3.14\* (dd, *J* = 13.5, 6.5 Hz, 1H), 3.05–2.96\* (m, 1H), 2.83 (dd, *J* = 13.5, 8.5 Hz, 1H), 2.78\* (s, 3H), 2.60\* (dd, *J* = 13.5, 8.0 Hz, 1H), 2.51–2.42 (m, 1H), 2.28 (dd, *J* = 13.5, 6.0 Hz, 1H), 2.19 (s, 3H), 0.98\* (d, *J* = 6.9 Hz, 3H), 0.93 (d, *J* = 6.7 Hz, 3H), 0.83 (d, *J* = 6.6 Hz, 3H), 0.72\* (d, *J* = 6.8 Hz, 3H); <sup>13</sup>C NMR (125.6 MHz, CDCl<sub>3</sub>) δ 177.6, 176.8\*, 162.9, 162.8\*, 146.9, 146.7, 142.4, 141.7\*, 139.9\*, 139.6, 128.7, 128.5\*, 128.3, 128.2\*, 128.1\*, 127.6, 126.9\*, 126.4, 110.3, 110.2\*, 76.3, 75.3\*, 57.9, 53.4, 38.9, 37.7\*, 36.3, 35.9\*, 32.4, 27.4\*, 17.4, 15.6\*, 14.3; IR (neat) 3422, 1618 cm<sup>-1</sup>; HRMS (ES<sup>+</sup>) calcd. for C<sub>20</sub>H<sub>26</sub>N<sub>2</sub>O<sub>3</sub>Na [M+Na]<sup>+</sup> 365.1841, found 365.1827.

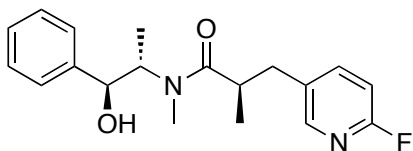

**(R)-3-(6-fluoropyridin-3-yl)-N-((1S,2S)-1-hydroxy-1-phenylpropan-2-yl)-N,2-**

**dimethylpropanamide (8f)** The reaction was carried out with trifluoroborate **6a** (90 mg, 0.263 mmol, 1.05 equiv) and 2-chloro-5-fluoropyridine (33 mg, 0.25 mmol, 1.0 equiv) according to the general Suzuki–Miyaura cross-coupling reaction procedure to obtain **8f** (66 mg, 0.20 mmol) as a light yellow oil in 80% yield.  $[\alpha]_D^{20} +32.2$  (c 0.75, CHCl<sub>3</sub>); <sup>1</sup>H

NMR (2:1 rotamer ratio, asterisk denotes minor rotamer peaks, 500 MHz, C<sub>6</sub>D<sub>6</sub>) δ 8.10\* (s, 1H), 7.86 (s, 1H), 7.39–7.02 (m, 6H), 6.47–6.42\* (m, 1H), 6.40–6.33 (m, 1H), 4.66 (br, 1H), 4.52 (s, 1H), 4.48 (s, 1H), 4.29\* (d, *J* = 7.5 Hz, 1H), 4.16\* (s, 1H), 3.90–3.80\* (m, 1H), 3.12–2.98 (m, 1H), 2.74\* (s, 3H), 2.52–2.44\* (m, 1H), 2.44–2.33 (m, 1H), 2.01 (s, 3H), 2.22–2.14 (m, 1H), 0.92\* (d, *J* = 6.5 Hz, 3H), 0.86 (d, *J* = 6.5 Hz, 3H), 0.81 (d, *J* = 6.5 Hz, 3H), 0.72\* (d, *J* = 6.5 Hz, 3H), <sup>13</sup>C NMR (125.6 MHz, CDCl<sub>3</sub>) δ 177.0, 176.2\*, 162.5 (d, *J* = 236.3 Hz), 162.3\* (d, *J* = 236.3 Hz), 147.7\* (d, *J* = 13.8 Hz), 147.5\* (d, *J* = 15.0 Hz), 142.3, 142.0 (d, *J* = 30.0 Hz), 142.0\* (d, *J* = 60.0 Hz), 133.6\* (d, *J* = 3.8 Hz), 133.3 (d, *J* = 3.8 Hz), 128.7\*, 128.4, 128.3\*, 127.7, 126.8\*, 126.4, 109.0 (d, *J* = 37.5 Hz), 108.8\* (d, *J* = 37.5 Hz), 76.2, 75.1\*, 57.9, 38.8, 37.6\*, 36.1, 35.8\*, 27.4, 17.7\*, 17.6, 15.6\*, 14.3; IR (neat) cm<sup>-1</sup>; HRMS (ES<sup>+</sup>) calcd. for C<sub>19</sub>H<sub>23</sub>N<sub>2</sub>O<sub>2</sub>FNa [M+Na]<sup>+</sup> 353.1641, found 353.1642.

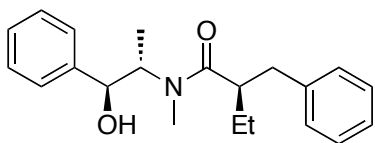

**(*R*)-2-benzyl-*N*-((1*S*,2*S*)-1-hydroxy-1-phenylpropan-2-yl)-*N*-methylbutanamide (9a).**

The reaction was carried out with trifluoroborate **6b** (93 mg, 0.263 mmol, 1.05 equiv) and chlorobenzene (28mg, 0.25 mmol, 1.0 equiv) according to the general Suzuki–Miyaura cross-coupling reaction procedure to obtain **8f** (57 mg, 0.18 mmol) as a white solid in 70% yield. [ $\alpha$ ]<sub>D</sub><sup>20</sup> +7.4 (c 1.37, CHCl<sub>3</sub>); mp: 85–88 °C; <sup>1</sup>H NMR (4:1 rotamer ratio, asterisk denotes minor rotamer peaks, 500 MHz, C<sub>6</sub>D<sub>6</sub>) δ 7.40–6.84 (m, 10H), 4.62 (br, 1H), 4.57–4.38 (m, 2H), 4.26\* (d, *J* = 8.0 Hz, 1H), 4.12–4.01\* (m, 1H), 3.42–3.31\* (m, 2H), 3.12–3.02\* (m, 1H), 2.95 (dd, *J* = 11.5, 8.5 Hz, 1H), 2.88–2.78\* (m, 1H), 2.81\* (s,



3H), 2.66–2.49 (m, 2H), 2.16 (s, 3H), 1.90–1.77 (m, 1H), 1.51–1.42\* (m, 1H), 1.42–1.31 (m, 1H), 0.81 (t,  $J = 7.5$  Hz, 3H), 0.76 (d,  $J = 6.5$  Hz, 3H), 0.71\* (d, 3H,  $J = 6.5$  Hz, 3H);  $^{13}\text{C}$  NMR (125.6 MHz,  $\text{CDCl}_3$ )  $\delta$  177.7, 176.5\*, 142.4, 141.4\*, 140.7\*, 140.1, 129.3\*, 129.0, 128.7\*, 128.5\*, 128.4, 128.3, 128.3\*, 127.7, 127.0\*, 126.6, 126.4\*, 126.3, 76.4, 75.2\*, 58.3, 46.5, 45.5\*, 39.4, 39.1\*, 32.3, 27.2\*, 26.2, 26.0\*, 15.6\*, 14.4, 12.1\*, 12.0; IR (neat) 3370, 2965, 1615  $\text{cm}^{-1}$ ; HRMS (ES+) calcd. for  $\text{C}_{21}\text{H}_{27}\text{NO}_2\text{Na}$   $[\text{M}+\text{Na}]^+$  348.1939, found 348.1927.

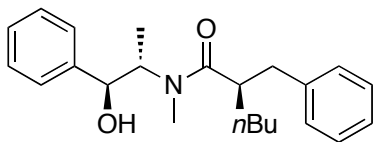

**(R)-2-Benzyl-N-((1S,2S)-1-hydroxy-1-phenylpropan-2-yl)-N-methylhexanamide**

**(9b).** The reaction was carried out with trifluoroborate **6c** (101 mg, 0.263 mmol, 1.05 equiv) and chlorobenzene (28 mg, 0.25 mmol, 1.0 equiv) for 48 h according to the general Suzuki–Miyaura cross-coupling reaction procedure to obtain **9b** (42 mg, 0.12 mmol) as a white solid in 47% yield.  $^1\text{H}$  NMR (4:1 rotamer ratio, asterisk denotes minor rotamer peaks, 500 MHz,  $\text{C}_6\text{D}_6$ )  $\delta$  7.40–6.99 (m, 10H), 4.58 (br, 1H), 4.50 (d,  $J = 7.5$  Hz, 1H), 4.20\* (d,  $J = 8.5$  Hz, 1H), 4.11–4.03\* (m, 1H), 3.40\* (dd,  $J = 13.5, 6.5$  Hz, 1H), 3.18–3.07\* (m, 1H), 2.98 (dd,  $J = 12.5, 9.0$  Hz, 1H), 2.85\* (dd,  $J = 13.0, 7.5$  Hz, 1H), 2.79\* (s, 3H), 2.72–2.63 (m, 1H), 2.58 (dd,  $J = 13.0, 5.0$  Hz, 1H), 2.17 (s, 3H), 1.92–1.82 (m, 1H), 1.51–1.06 (m, 6H), 2.92\* (t,  $J = 7.5$  Hz, 3H), 0.89 (t,  $J = 7.5$  Hz, 3H), 0.76 (d,  $J = 7.5$  Hz, 3H), 0.72\* (d,  $J = 6.5$  Hz, 3H). Data is consistent with that reported in the literature.<sup>a</sup>

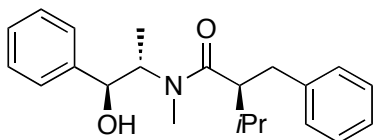

**(S)-2-Benzyl-N-((1S,2S)-1-hydroxy-1-phenylpropan-2-yl)-N,3-dimethylbutanamide**

**(9c).** The reaction was carried out with trifluoroborate **6d** (97 mg, 0.263 mmol, 1.05 equiv) and chlorobenzene (28 mg, 0.25 mmol, 1.0 equiv) for 48 h according to the general Suzuki–Miyaura cross-coupling reaction procedure to obtain **9c** (25 mg, 0.08 mmol) as a white solid in 30% yield. <sup>1</sup>H NMR (10:1 rotamer ratio, asterisk denotes minor rotamer peaks, 500 MHz, C<sub>6</sub>D<sub>6</sub>) δ 7.42–6.96 (m, 10H), 4.63 (br, 1H), 4.37 (d, *J* = 7.5 Hz, 1H), 4.02–3.81 (m, 1H), 3.34\* (dd, *J* = 12.5, 10.0 Hz, 1H), 2.99 (dd, *J* = 11.5, 11.5 Hz, 1H), 2.85\* (dd, *J* = 13.0, 4.5 Hz, 1H), 2.72 (dd, *J* = 12.5, 3.5 Hz, 1H), 2.63\* (s, 3H), 2.51–2.41 (m, 1H), 2.09 (s, 3H), 2.07–2.01 (m, 1H), 0.95 (dd, *J* = 13.5, 6.5 Hz, 6H), 0.64\* (d, *J* = 6.5 Hz, 3H), 0.60 (d, *J* = 7.0 Hz, 3H). Data is consistent with that reported in the literature.<sup>a</sup>

**Reference:**

(a) Myers, A. G.; Yang, B. H.; Chen, H.; McKinstry, L.; Kopecky, D. J.; Gleason, J. L. *J. Am. Chem. Soc.* **1997**, *119*, 649

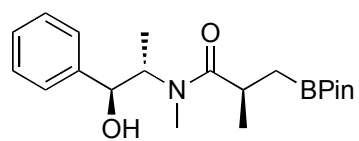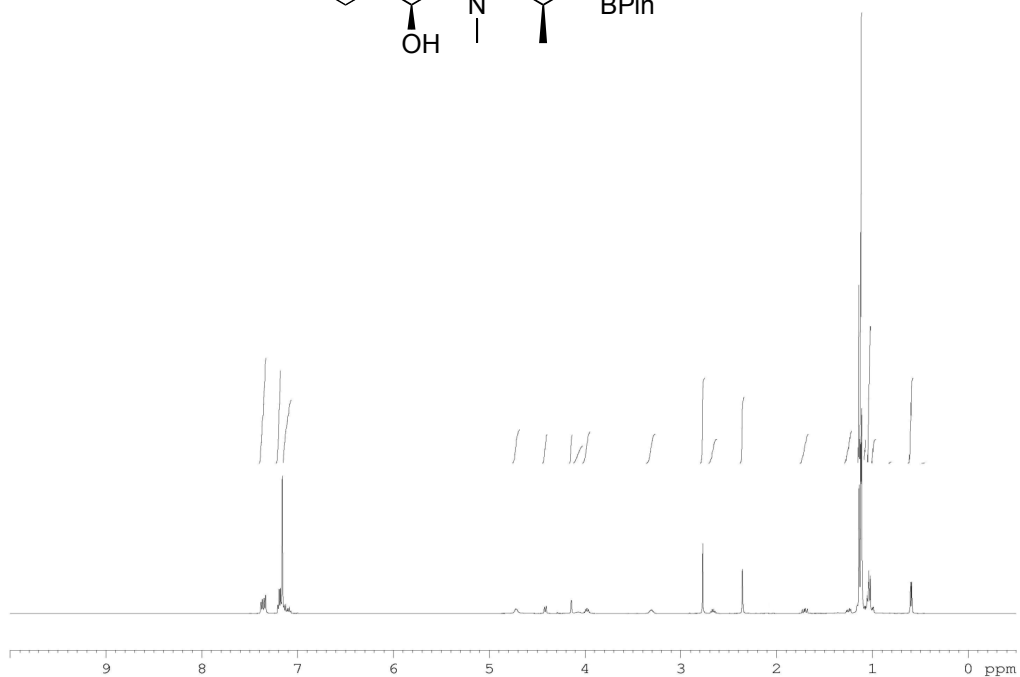

$^1\text{H}$  NMR (500 MHz,  $\text{C}_6\text{D}_6$ ) Spectrum of **5a**

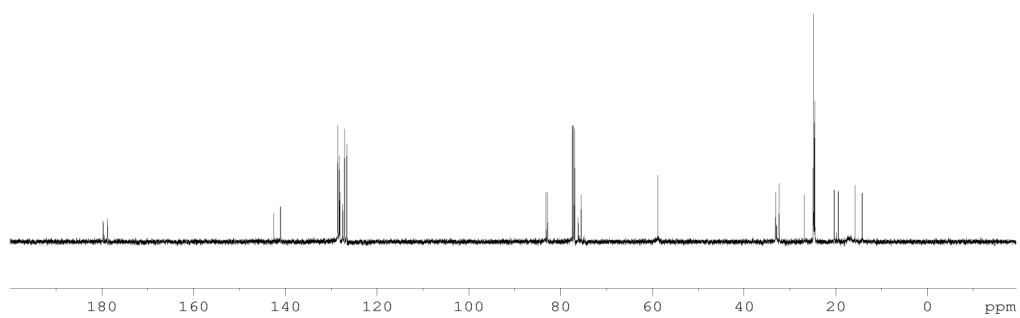

$^{13}\text{C}$  NMR (125 MHz,  $\text{CDCl}_3$ ) Spectrum of **5a**

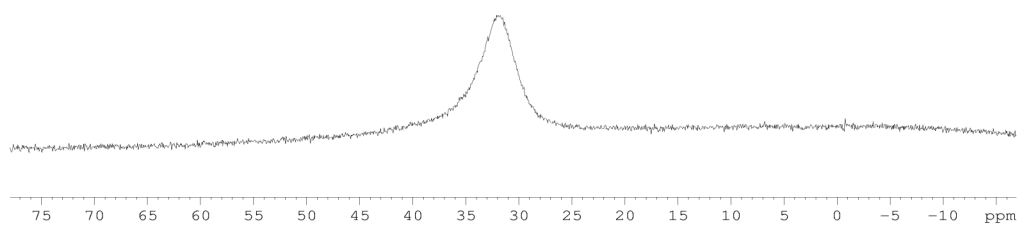

$^{11}\text{B}$  NMR (128.4 MHz,  $\text{C}_6\text{D}_6$ ) Spectrum of **5a**

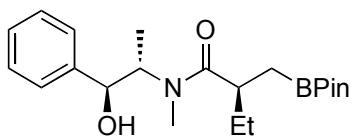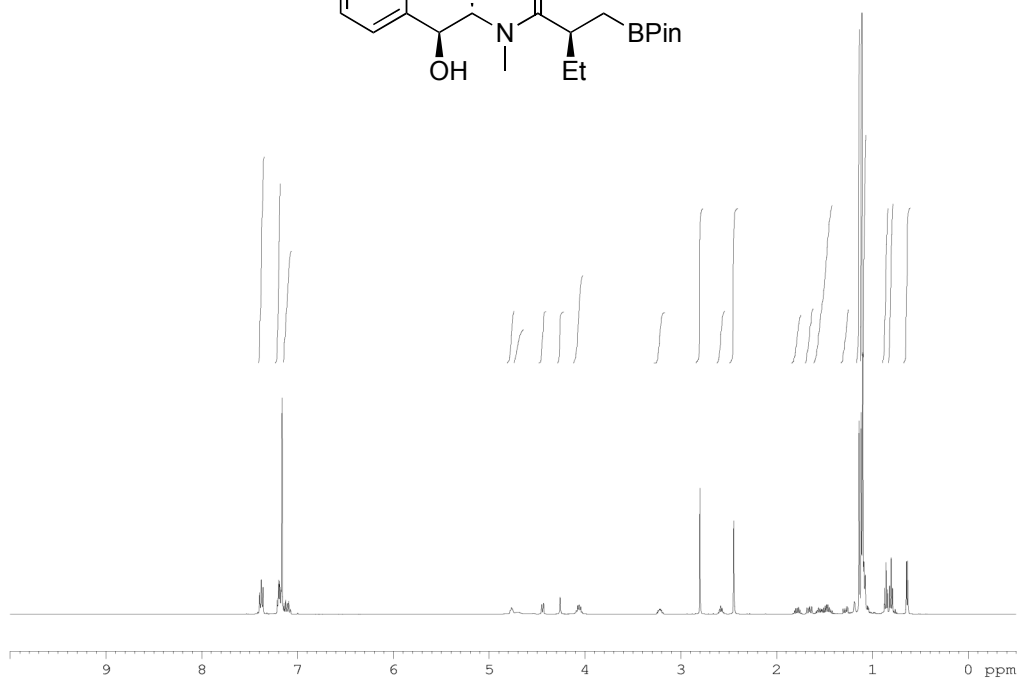

$^1\text{H}$  NMR (500 MHz,  $\text{C}_6\text{D}_6$ ) Spectrum of **5b**

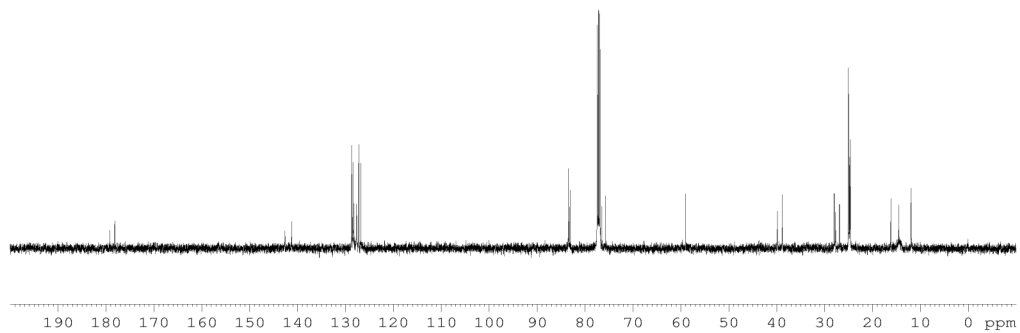

$^{13}\text{C}$  NMR (125 MHz,  $\text{CDCl}_3$ ) Spectrum of **5b**

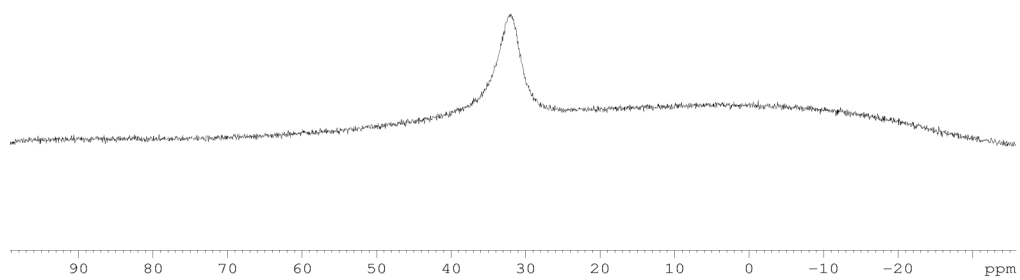

$^{11}\text{B}$  NMR (128.4 MHz,  $\text{C}_6\text{D}_6$ ) Spectrum of **5b**

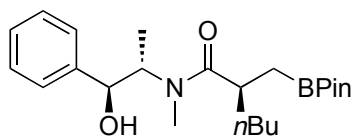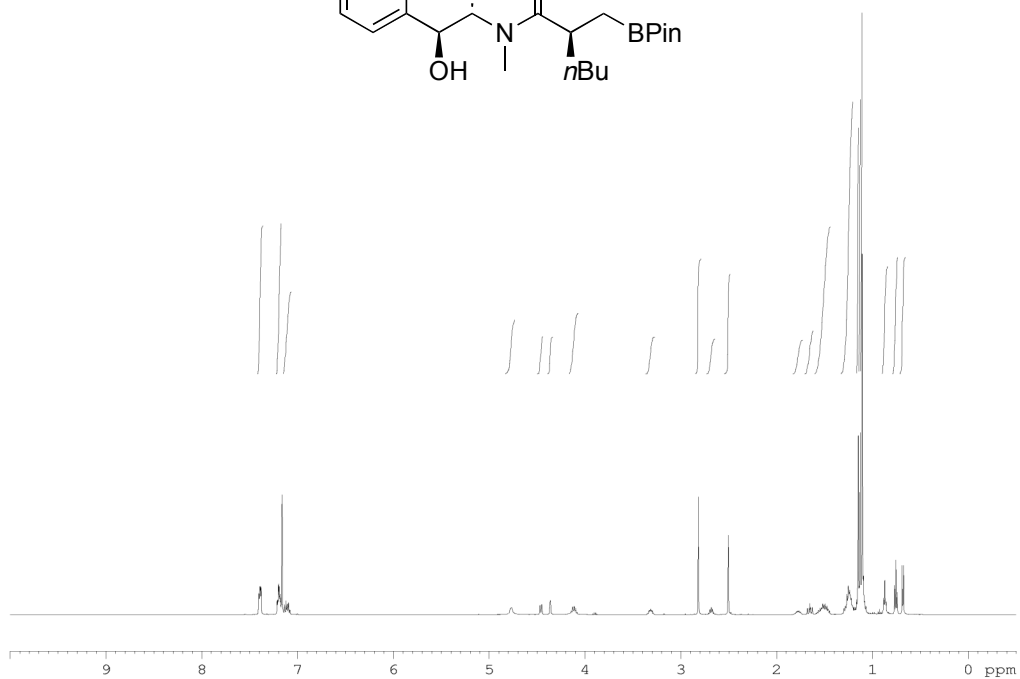

$^1\text{H}$  NMR (500 MHz,  $\text{C}_6\text{D}_6$ ) Spectrum of **5c**

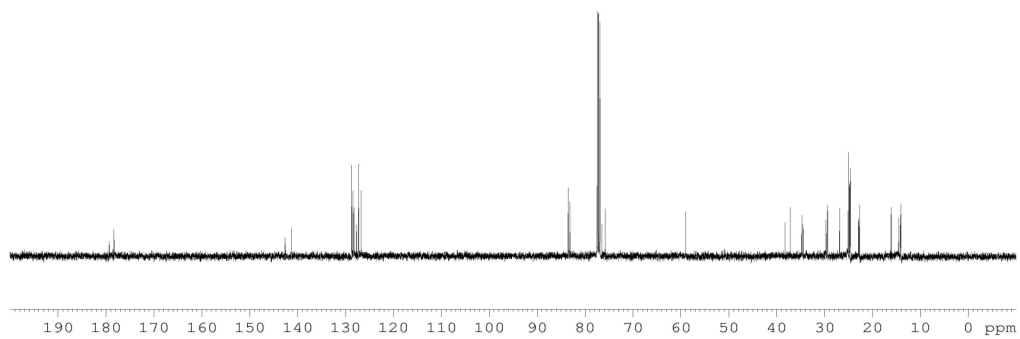

$^{13}\text{C}$  NMR (125 MHz,  $\text{CDCl}_3$ ) Spectrum of **5c**

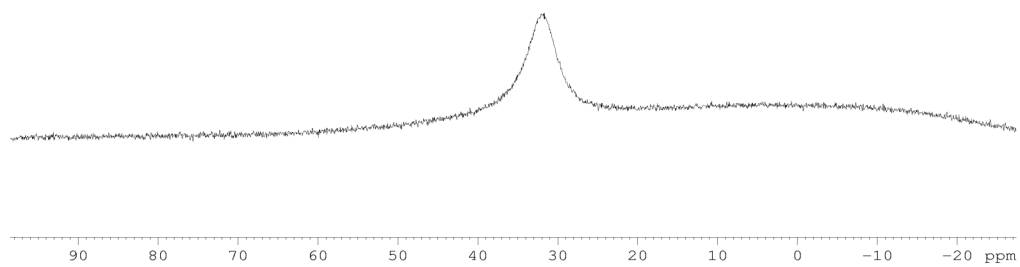

$^{11}\text{B}$  NMR (128.4 MHz,  $\text{C}_6\text{D}_6$ ) Spectrum of **5c**



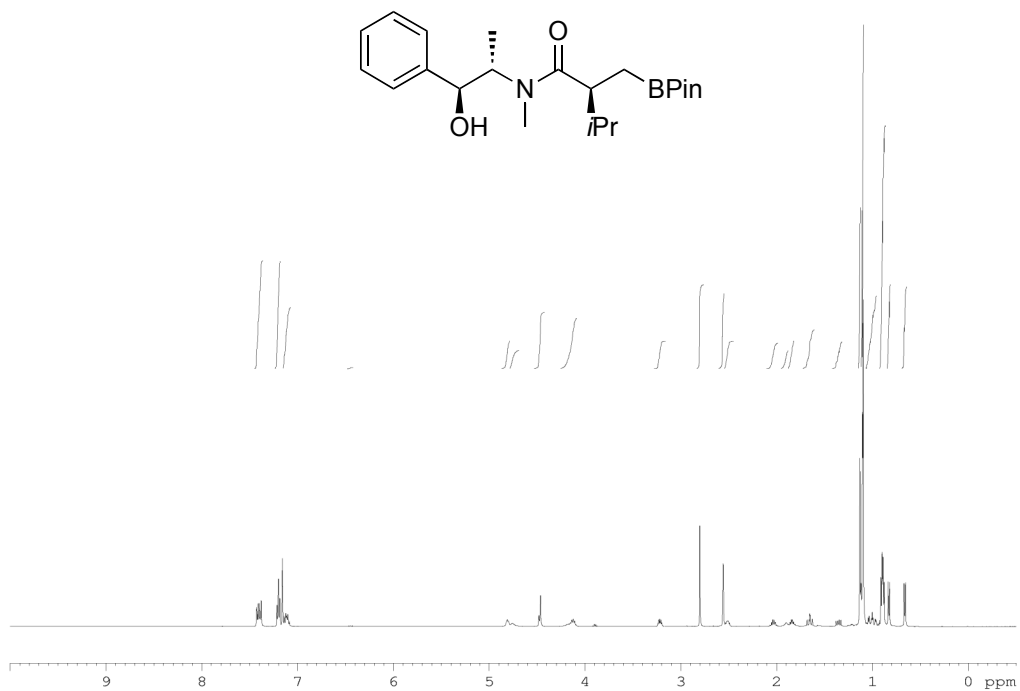

<sup>1</sup>H NMR (500 MHz, C<sub>6</sub>D<sub>6</sub>) Spectrum of **5d**

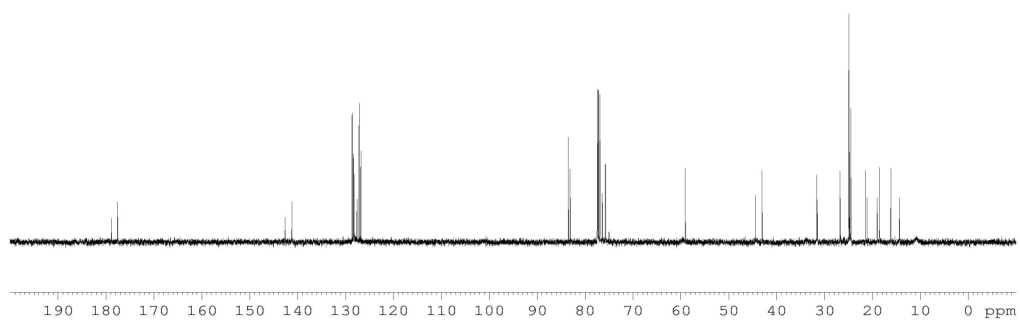

<sup>13</sup>C NMR (125 MHz, CDCl<sub>3</sub>) Spectrum of **5d**

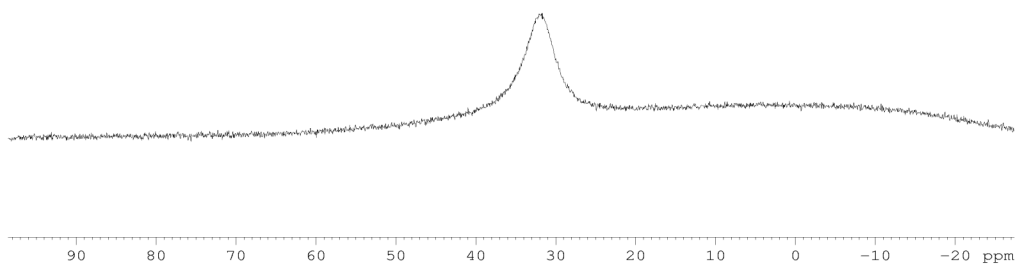

$^{11}\text{B}$  NMR (128.4 MHz,  $\text{C}_6\text{D}_6$ ) Spectrum of **5d**

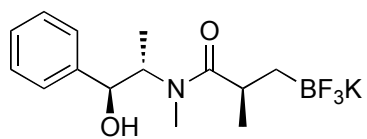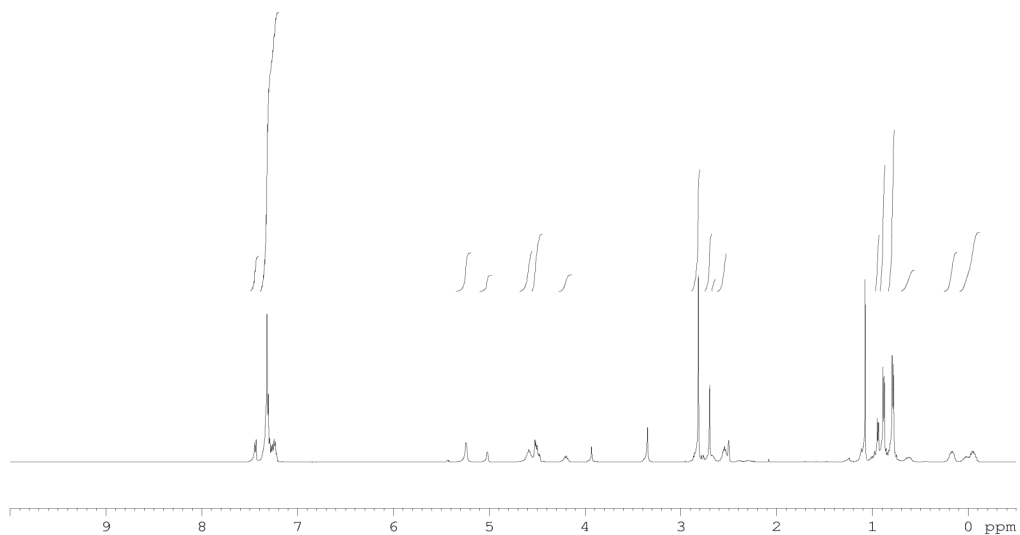

$^1\text{H}$  NMR (500 MHz,  $\text{DMSO-}d_6$ ) Spectrum of **6a**

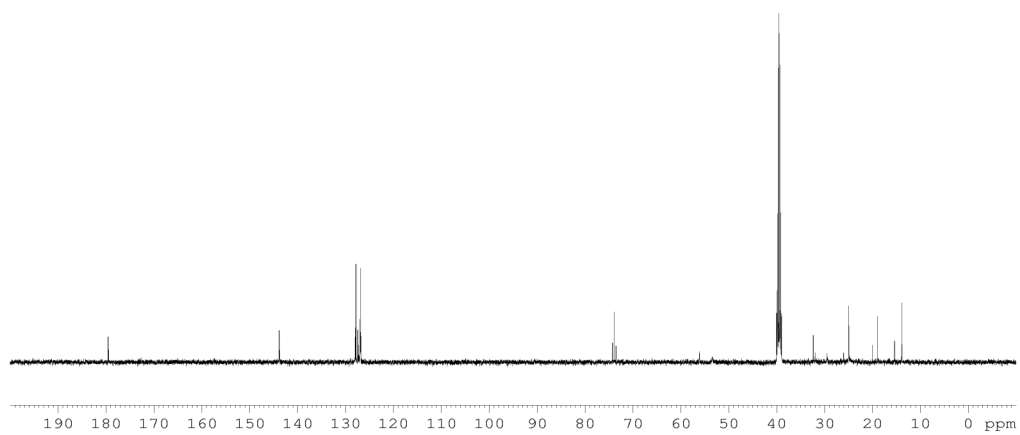

$^{13}\text{C}$  NMR (125 MHz,  $\text{DMSO-}d_6$ ) Spectrum of **6a**

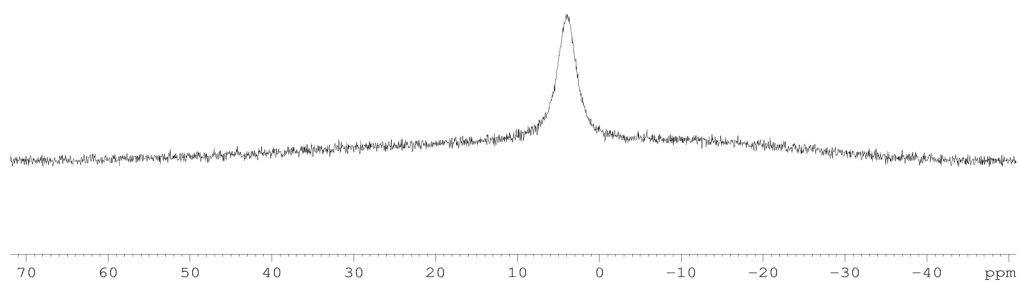

$^{11}\text{B}$  NMR (128.4 MHz,  $\text{DMSO-}d_6$ ) Spectrum of **6a**

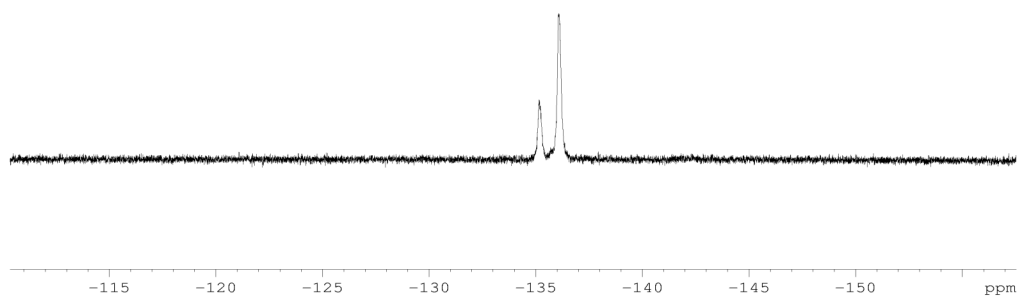

$^{19}\text{F}$  NMR (470.8 MHz,  $\text{DMSO-}d_6$ ) Spectrum of **6a**

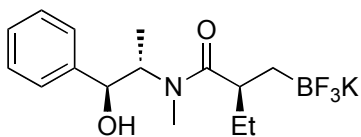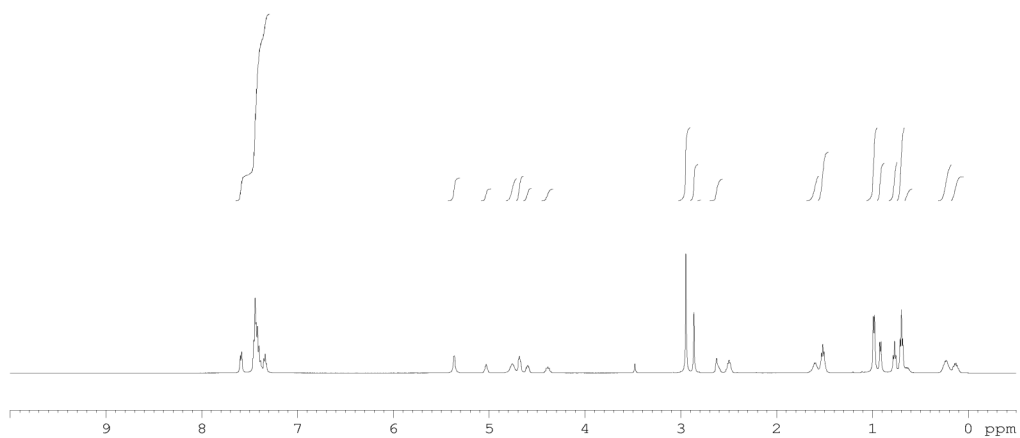

$^1\text{H}$  NMR (500 MHz,  $\text{DMSO-}d_6$ ) Spectrum of **6b**

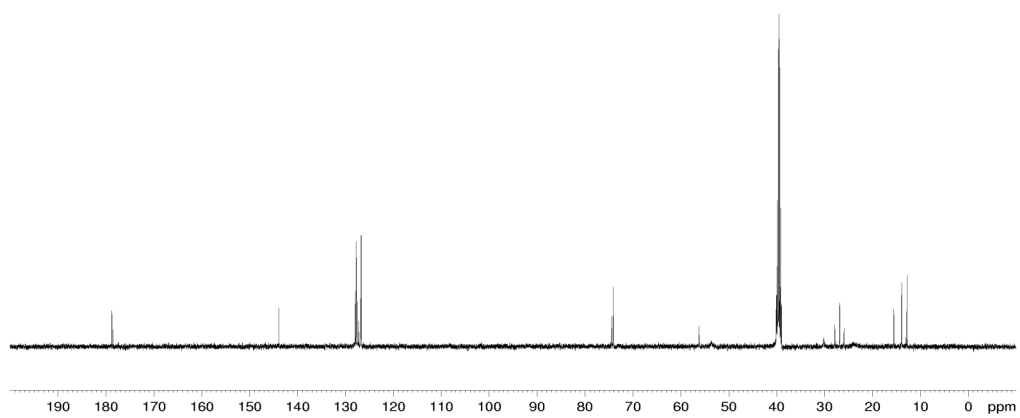

$^{13}\text{C}$  NMR (125 MHz,  $\text{DMSO-}d_6$ ) Spectrum of **6b**

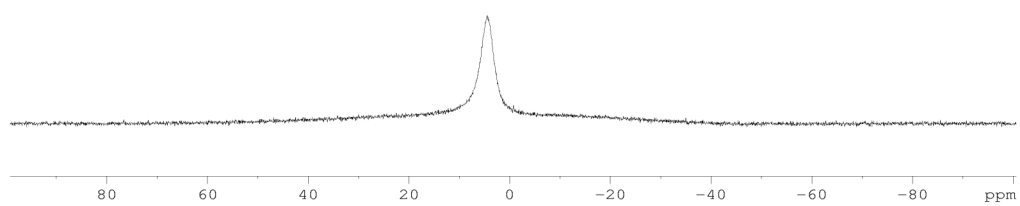

$^{11}\text{B}$  NMR (128.4 MHz,  $\text{DMSO-}d_6$ ) Spectrum of **6b**

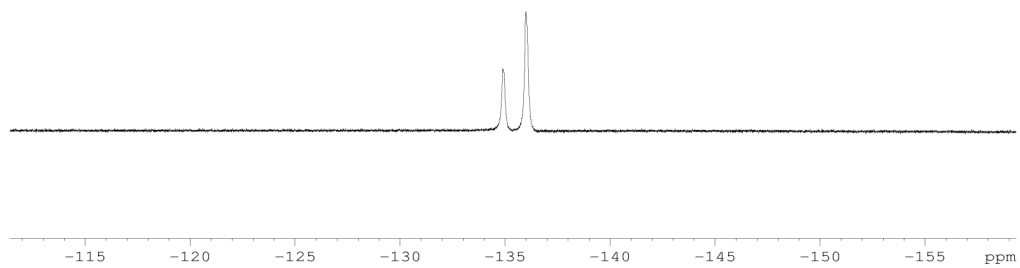

$^{19}\text{F}$  NMR (470.8 MHz,  $\text{DMSO-}d_6$ ) Spectrum of **6b**

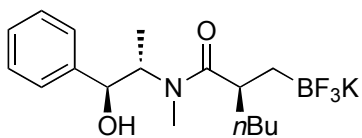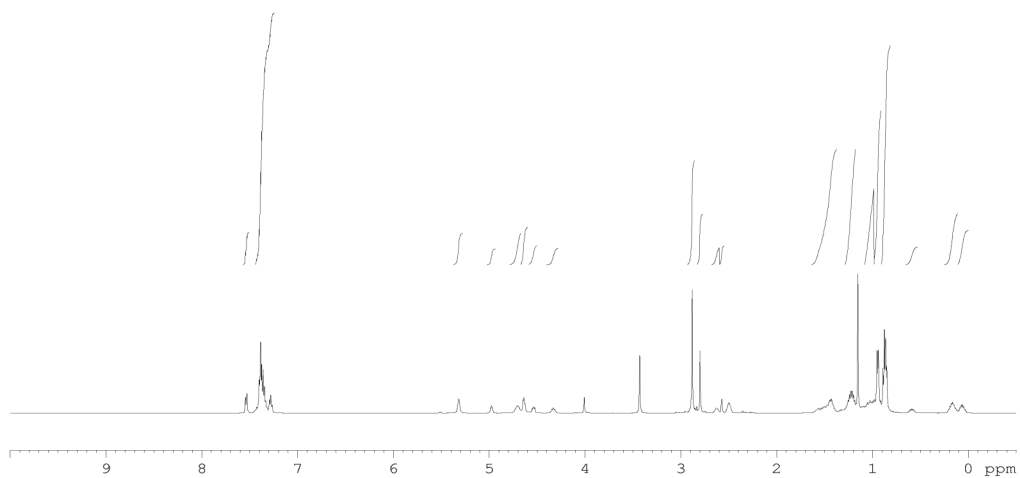

<sup>1</sup>H NMR (500 MHz, DMSO-*d*<sub>6</sub>) Spectrum of **6c**

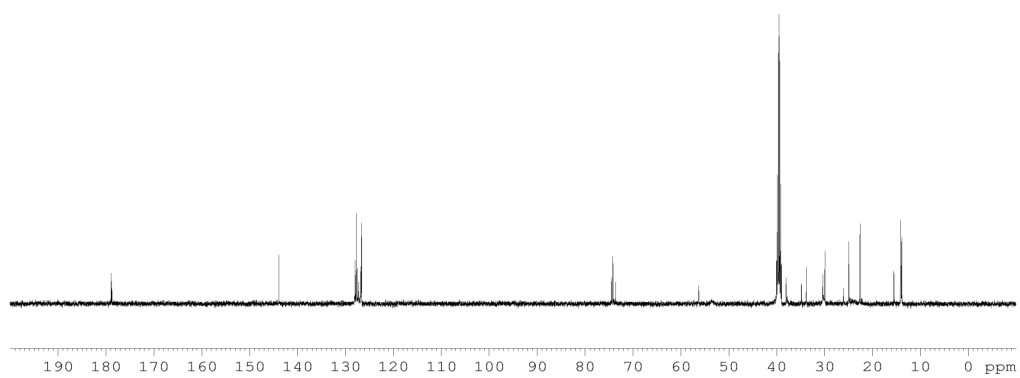

<sup>13</sup>C NMR (125 MHz, DMSO-*d*<sub>6</sub>) Spectrum of **6c**

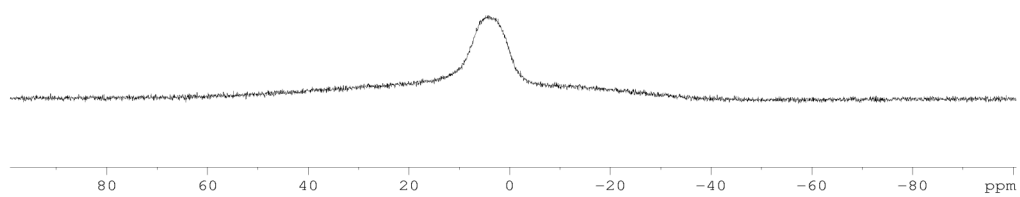

$^{11}\text{B}$  NMR (128.4 MHz,  $\text{DMSO-}d_6$ ) Spectrum of **6c**

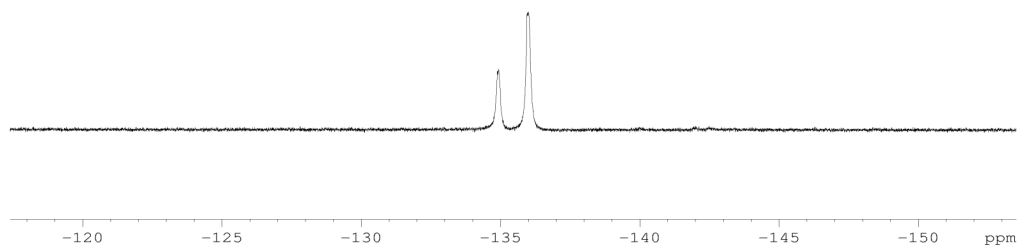

$^{19}\text{F}$  NMR (470.8 MHz,  $\text{DMSO-}d_6$ ) Spectrum of **6c**



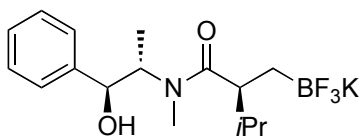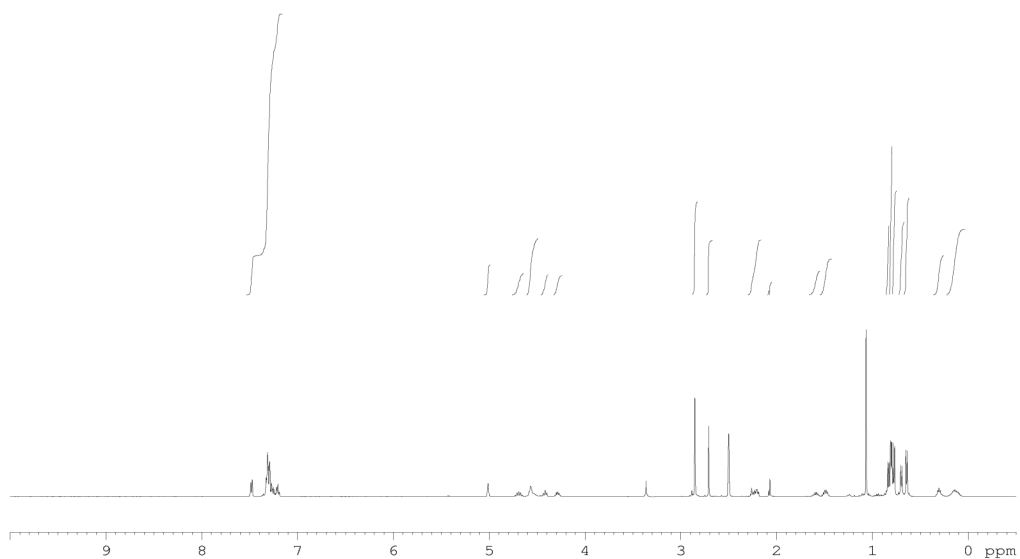

$^1\text{H}$  NMR (500 MHz,  $\text{DMSO-}d_6$ ) Spectrum of **6d**

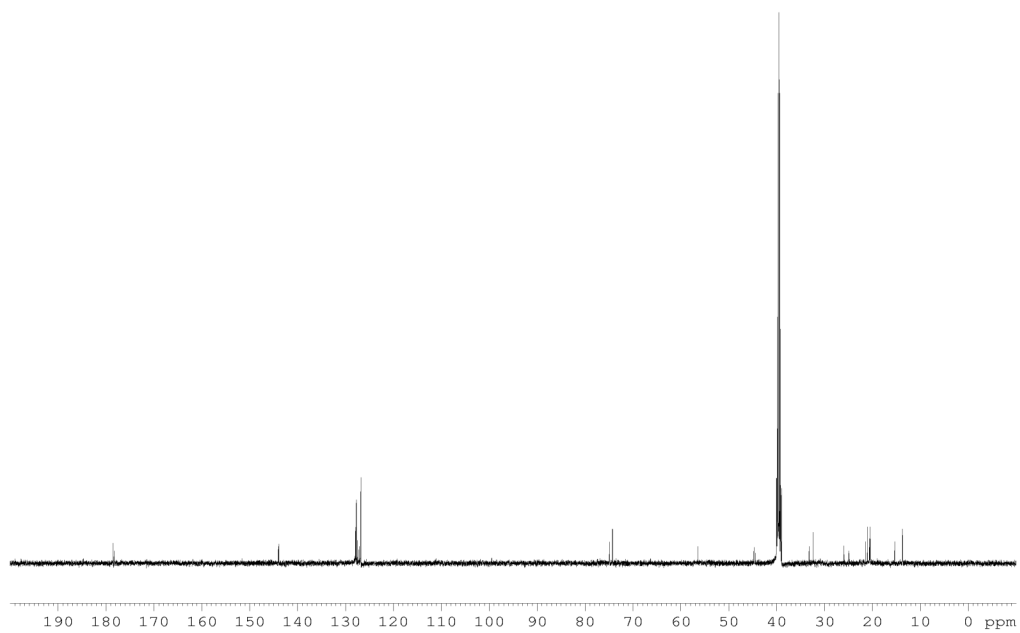

$^{13}\text{C}$  NMR (125 MHz,  $\text{DMSO-}d_6$ ) Spectrum of **6d**

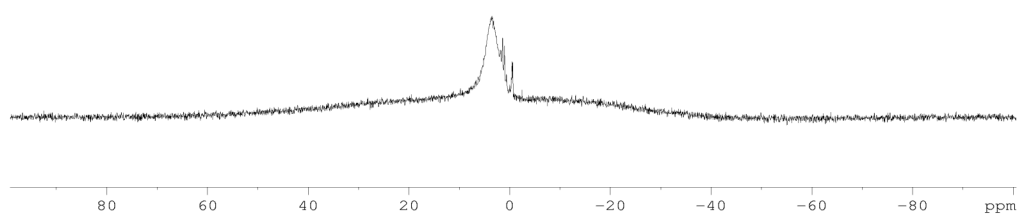

$^{11}\text{B}$  NMR (128.4 MHz,  $\text{DMSO-}d_6$ ) Spectrum of **6d**

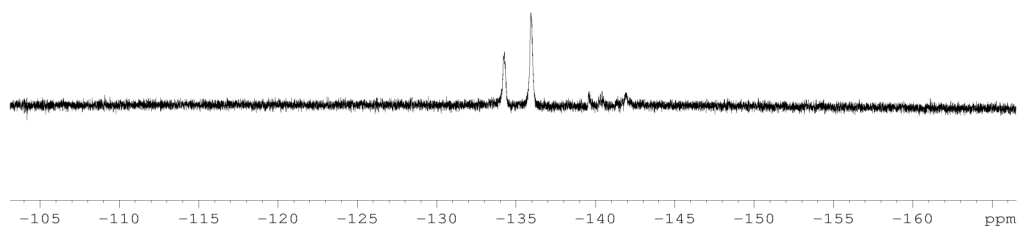

$^{19}\text{F}$  NMR (470.8 MHz,  $\text{DMSO-}d_6$ ) Spectrum of **6d**

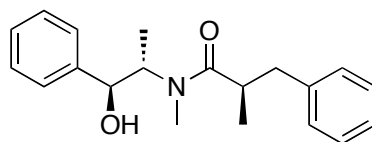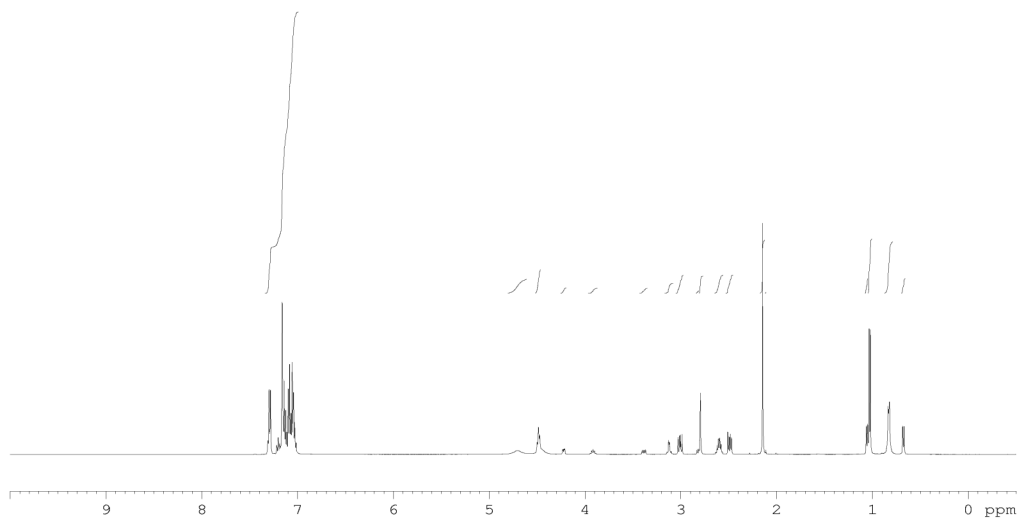

$^1\text{H}$  NMR (500 MHz,  $\text{C}_6\text{D}_6$ ) Spectrum of **7a**

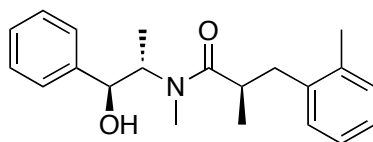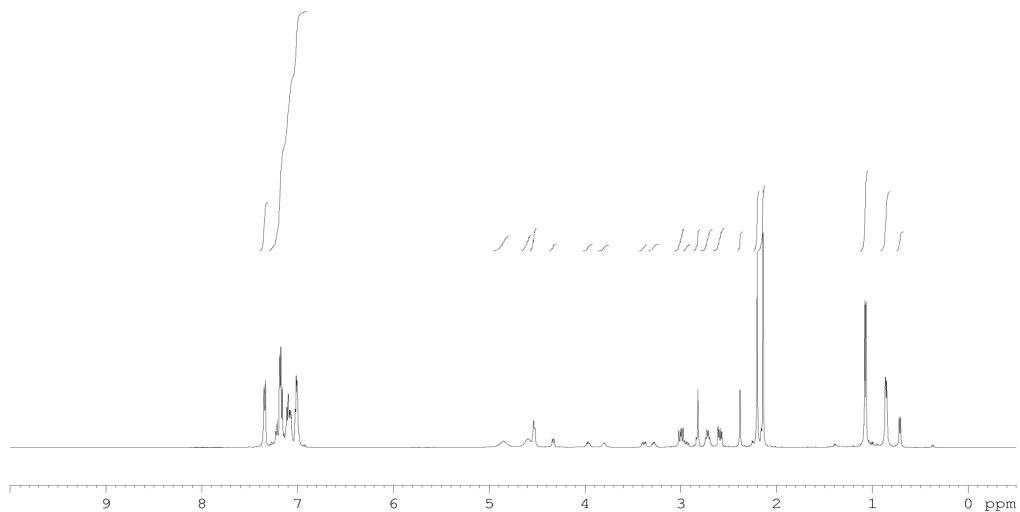

<sup>1</sup>H NMR (500 MHz, C<sub>6</sub>D<sub>6</sub>) Spectrum of **7b**

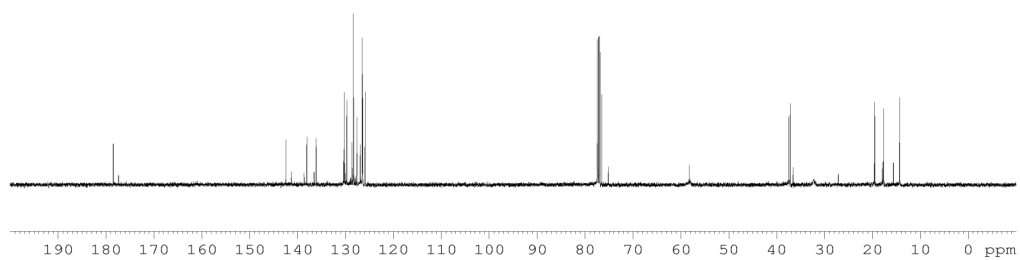

<sup>13</sup>C NMR (125 MHz, CDCl<sub>3</sub>) Spectrum of **7b**

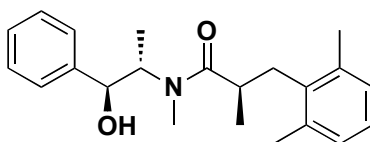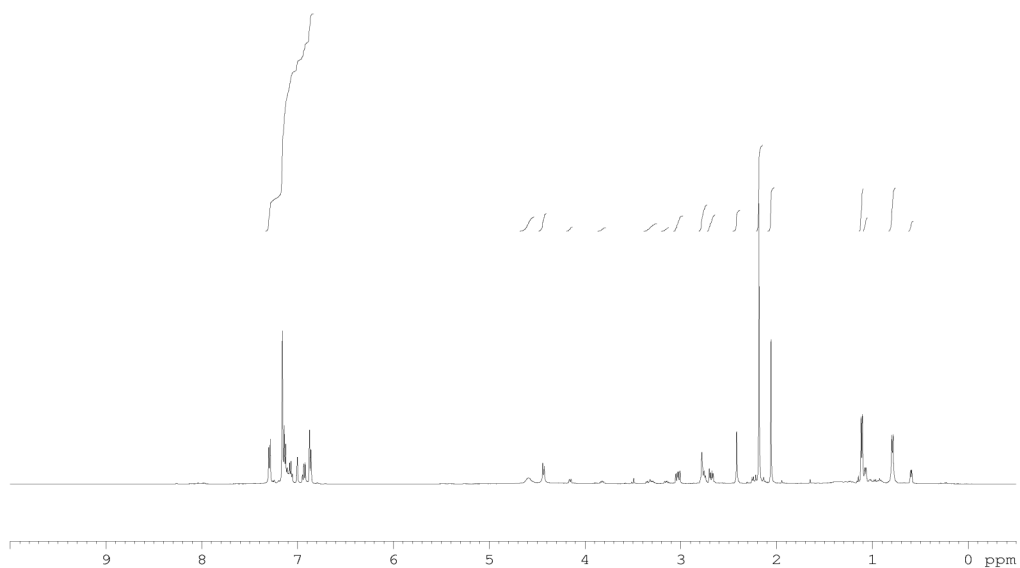

$^1\text{H}$  NMR (500 MHz,  $\text{C}_6\text{D}_6$ ) Spectrum of **7c**

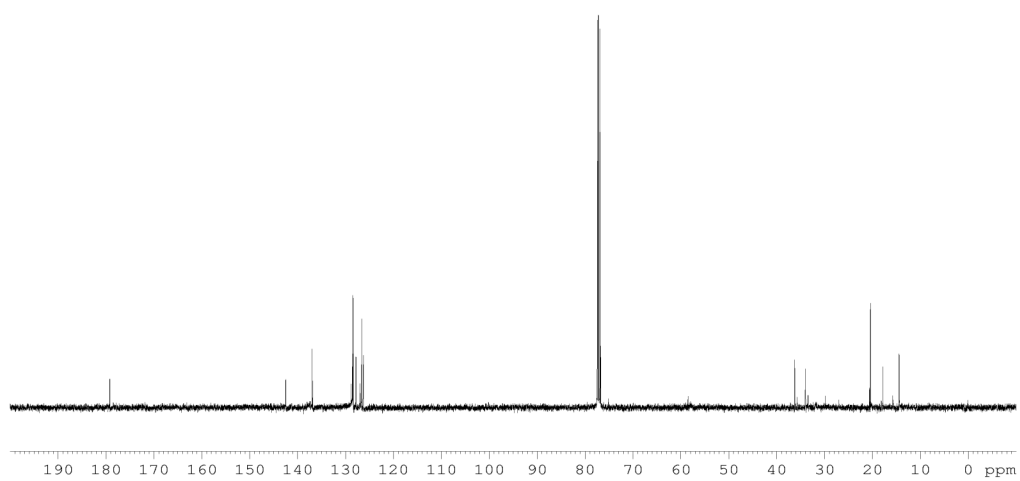

$^{13}\text{C}$  NMR (125 MHz,  $\text{CDCl}_3$ ) Spectrum of **7c**

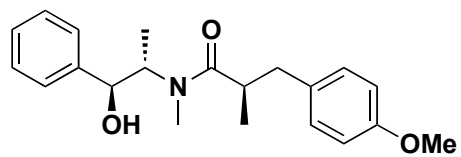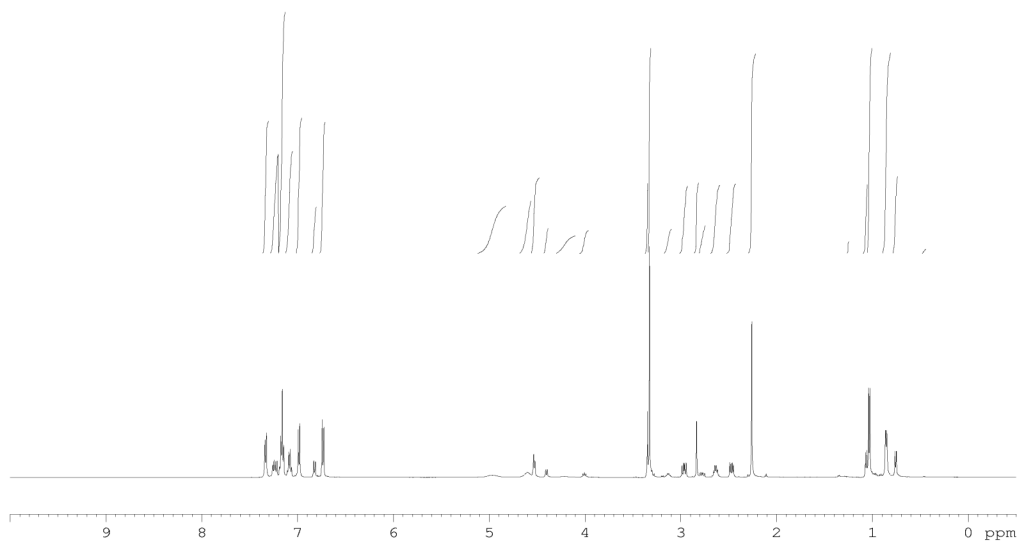

$^1\text{H}$  NMR (500 MHz,  $\text{C}_6\text{D}_6$ ) Spectrum of **7d**

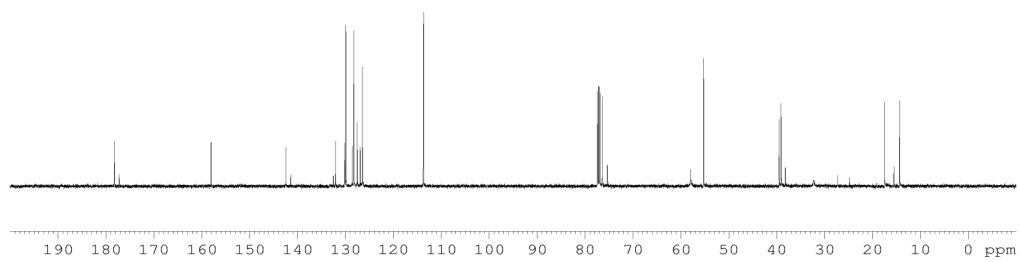

$^{13}\text{C}$  NMR (125 MHz,  $\text{CDCl}_3$ ) Spectrum of **7d**

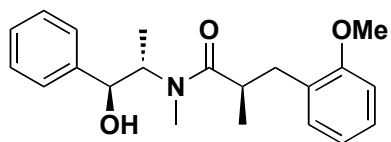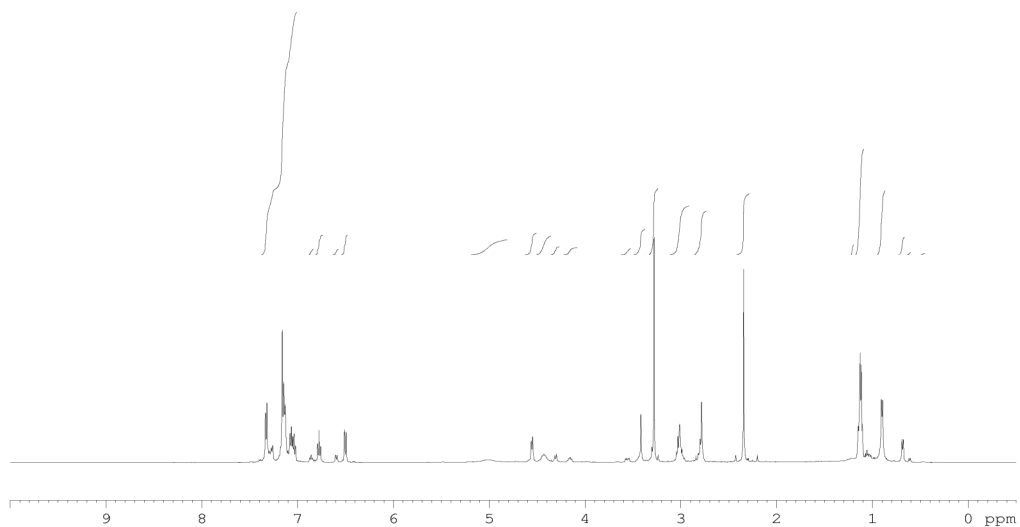

$^1\text{H}$  NMR (500 MHz,  $\text{C}_6\text{D}_6$ ) Spectrum of **7e**

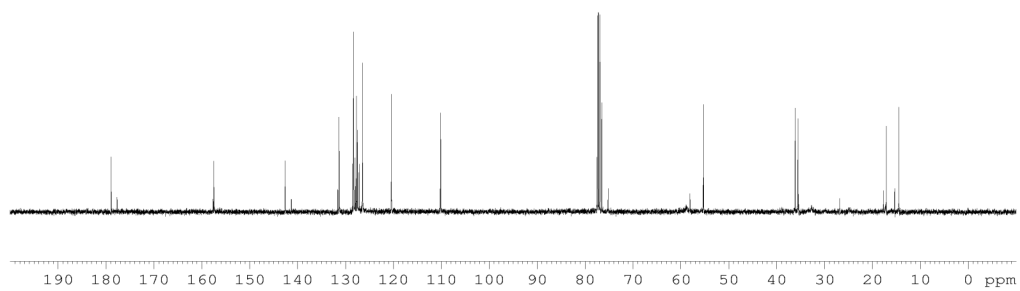

$^{13}\text{C}$  NMR (125 MHz,  $\text{CDCl}_3$ ) Spectrum of **7e**

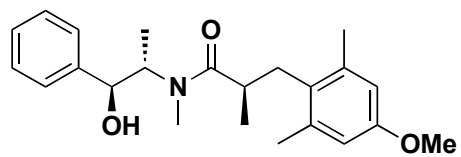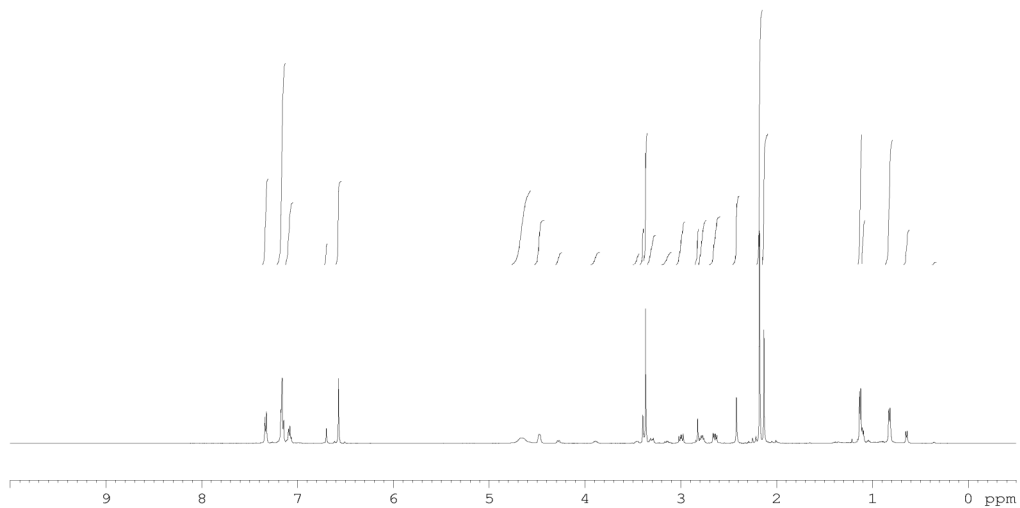

$^1\text{H}$  NMR (500 MHz,  $\text{C}_6\text{D}_6$ ) Spectrum of **7f**

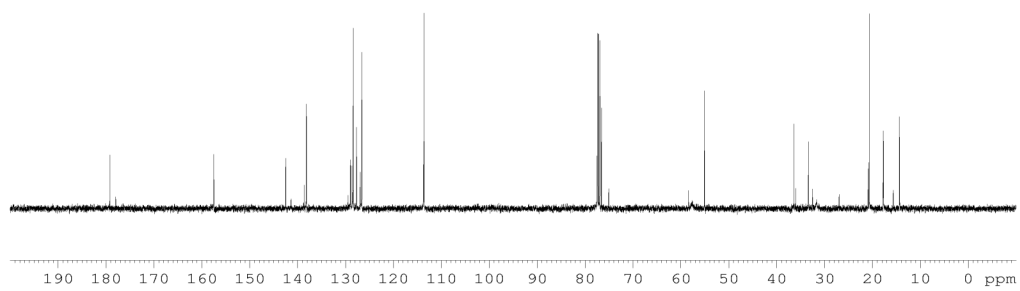

$^{13}\text{C}$  NMR (125 MHz,  $\text{CDCl}_3$ ) Spectrum of **7f**



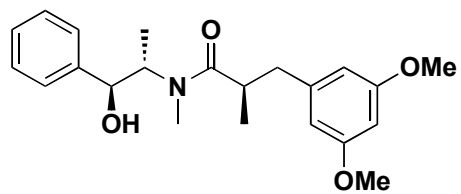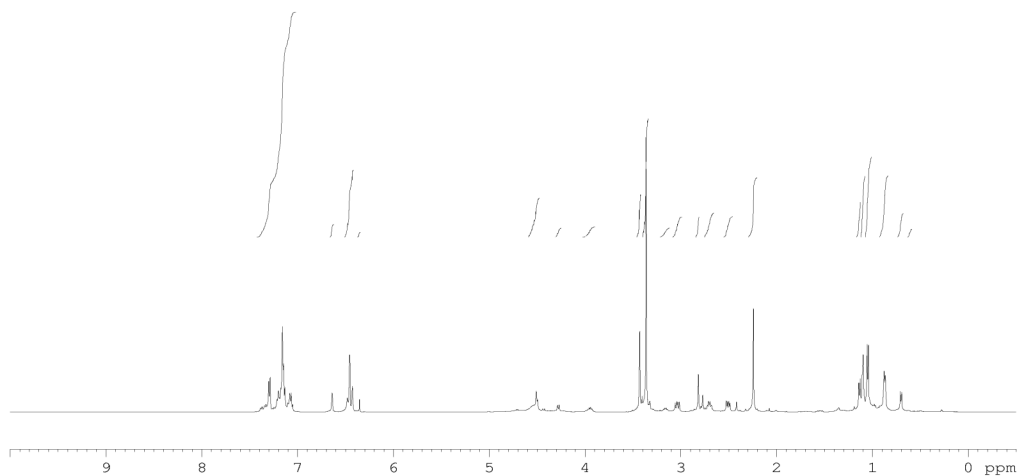

$^1\text{H}$  NMR (500 MHz,  $\text{C}_6\text{D}_6$ ) Spectrum of **7g**

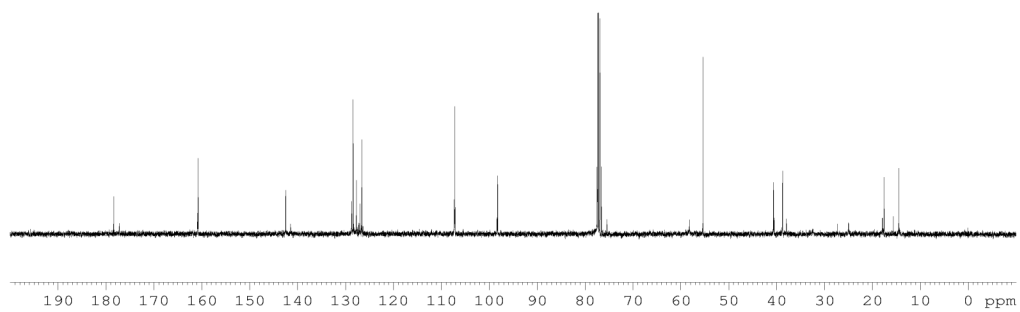

$^{13}\text{C}$  NMR (125 MHz,  $\text{CDCl}_3$ ) Spectrum of **7g**

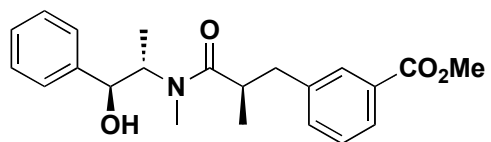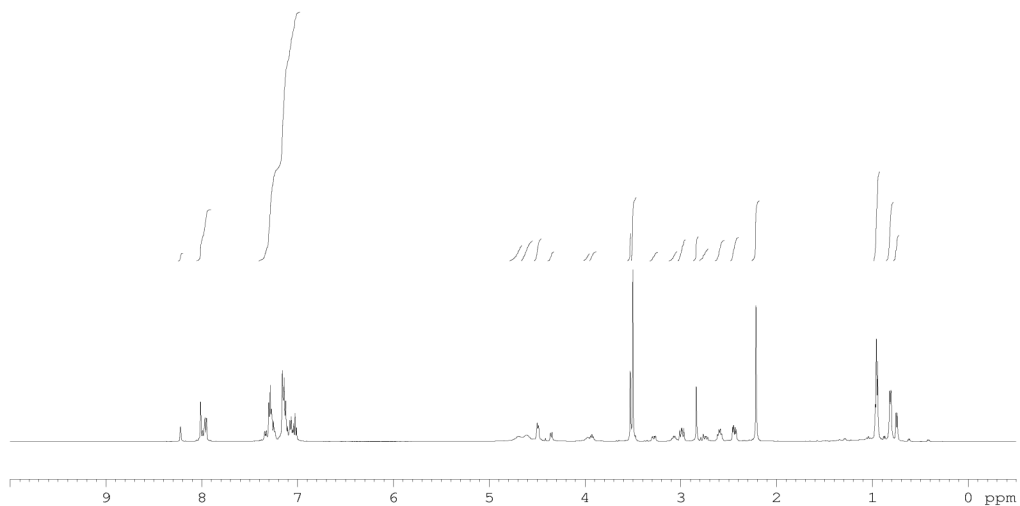

$^1\text{H}$  NMR (500 MHz,  $\text{C}_6\text{D}_6$ ) Spectrum of **7h**

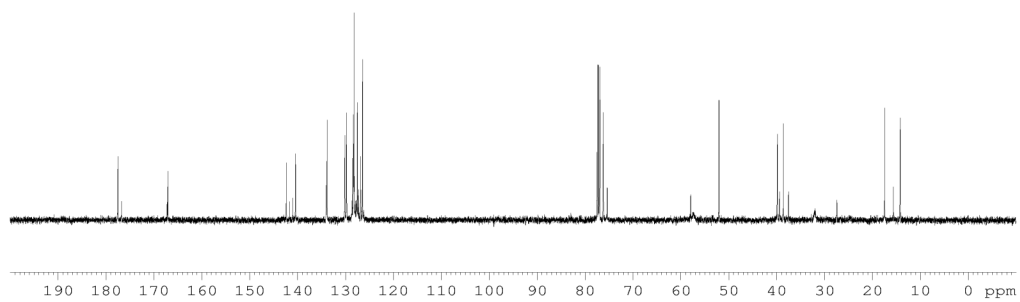

$^{13}\text{C}$  NMR (125 MHz,  $\text{CDCl}_3$ ) Spectrum of **7h**

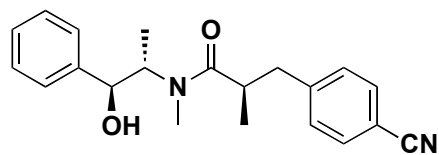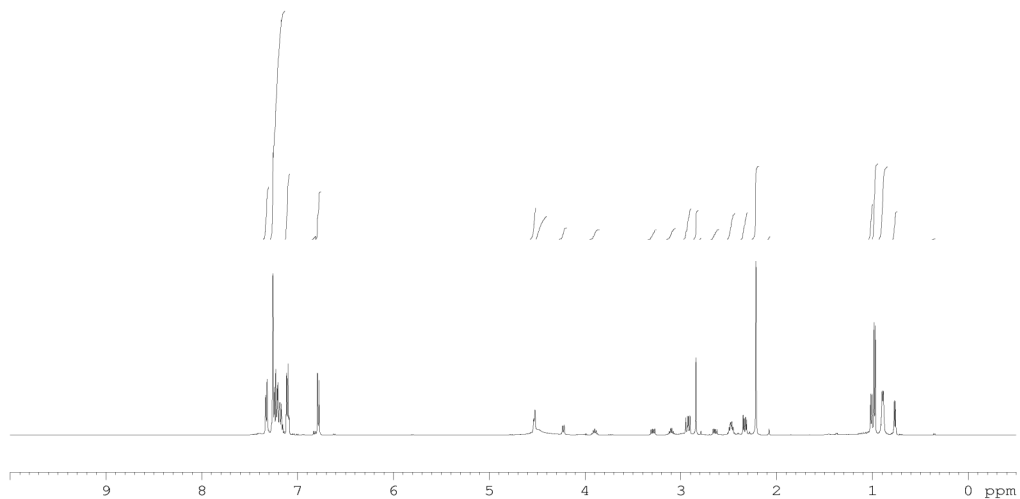

$^1\text{H}$  NMR (500 MHz,  $\text{C}_6\text{D}_6$ ) Spectrum of **7i**

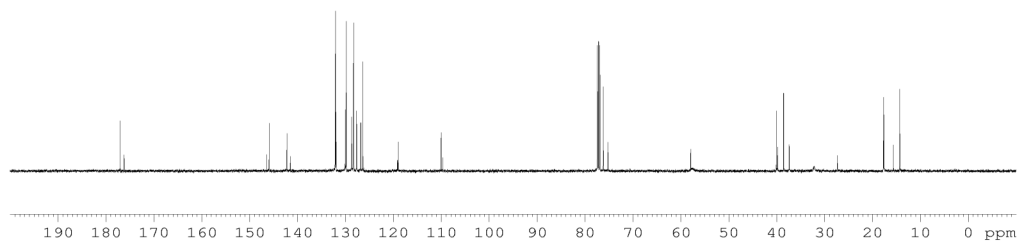

$^{13}\text{C}$  NMR (125 MHz,  $\text{CDCl}_3$ ) Spectrum of **7i**

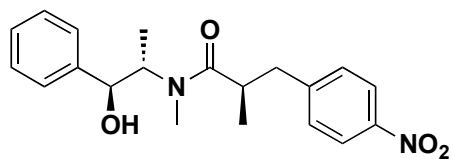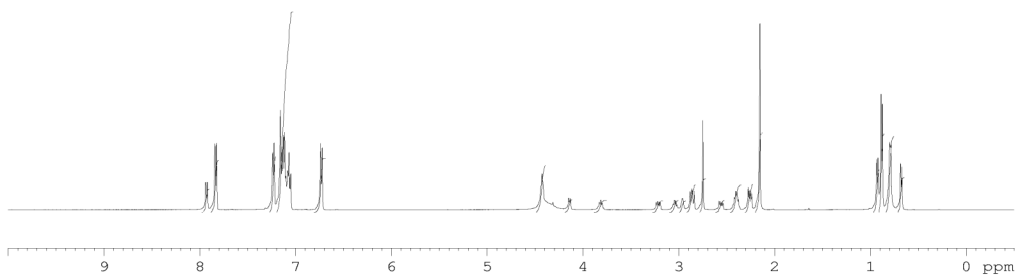

$^1\text{H}$  NMR (500 MHz,  $\text{C}_6\text{D}_6$ ) Spectrum of **7j**

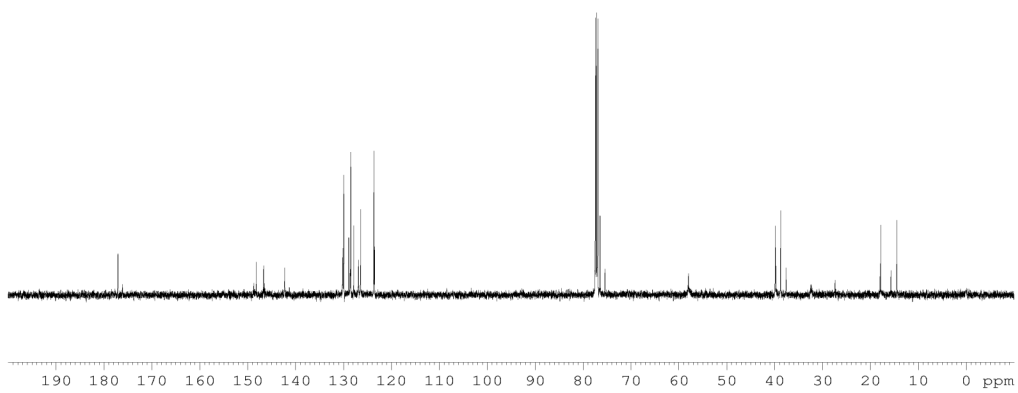

$^{13}\text{C}$  NMR (125 MHz,  $\text{CDCl}_3$ ) Spectrum of **7j**

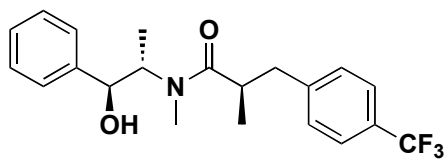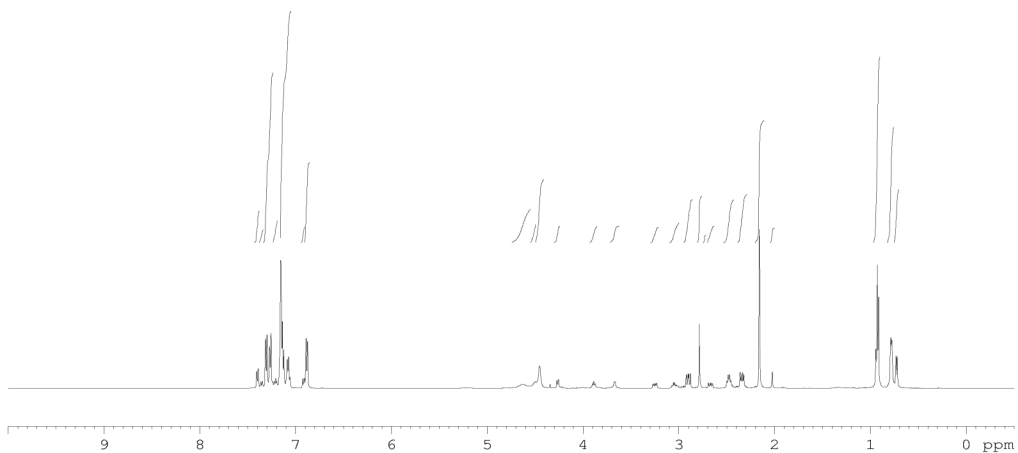

<sup>1</sup>H NMR (500 MHz, C<sub>6</sub>D<sub>6</sub>) Spectrum of **7k**

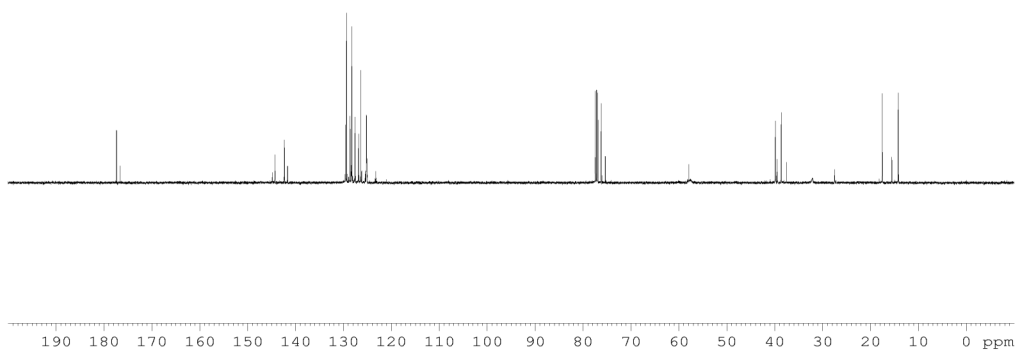

<sup>13</sup>C NMR (125 MHz, CDCl<sub>3</sub>) Spectrum of **7k**

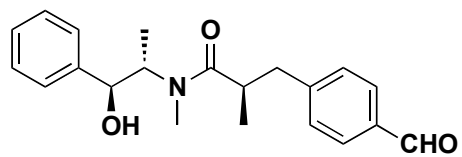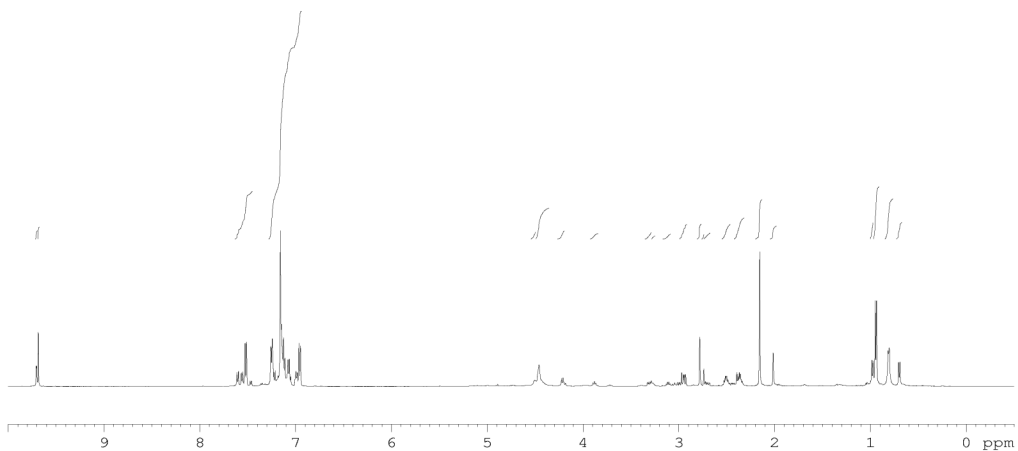

$^1\text{H}$  NMR (500 MHz,  $\text{C}_6\text{D}_6$ ) Spectrum of **71**

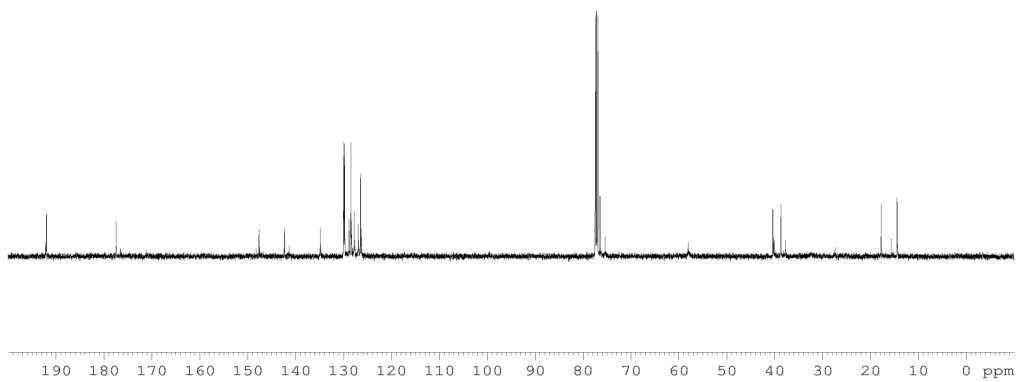

$^{13}\text{C}$  NMR (125 MHz,  $\text{CDCl}_3$ ) Spectrum of **71**

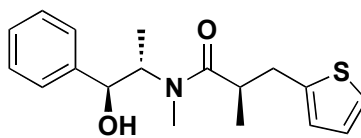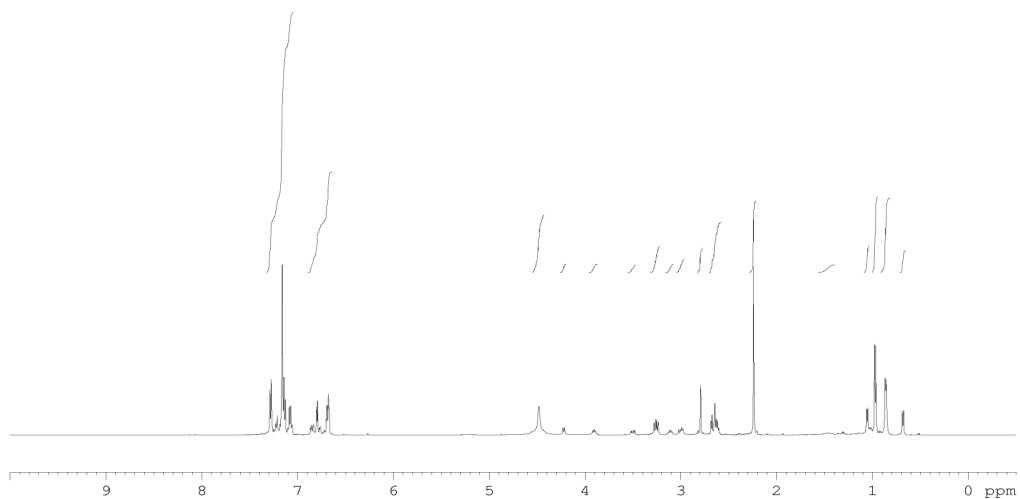

<sup>1</sup>H NMR (500 MHz, C<sub>6</sub>D<sub>6</sub>) Spectrum of **8a**

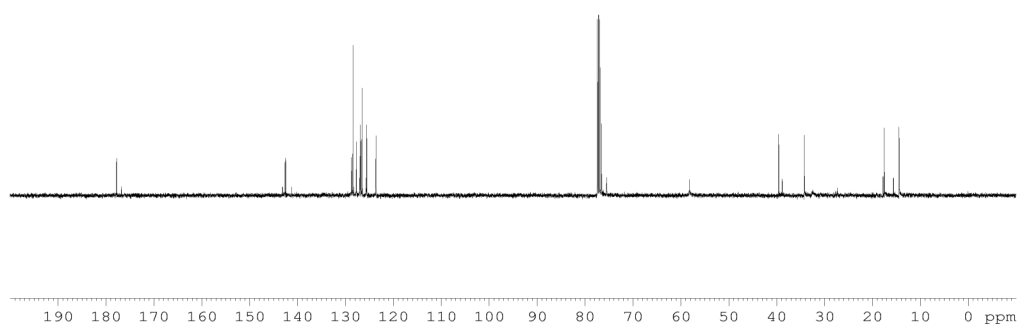

<sup>13</sup>C NMR (125 MHz, CDCl<sub>3</sub>) Spectrum of **8a**

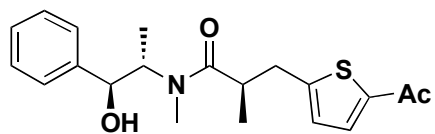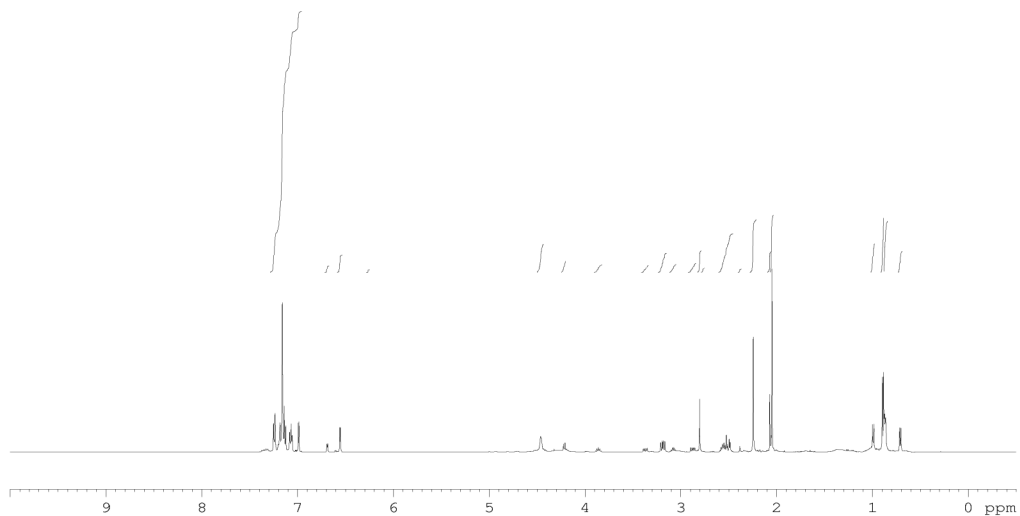

$^1\text{H}$  NMR (500 MHz,  $\text{C}_6\text{D}_6$ ) Spectrum of **8b**

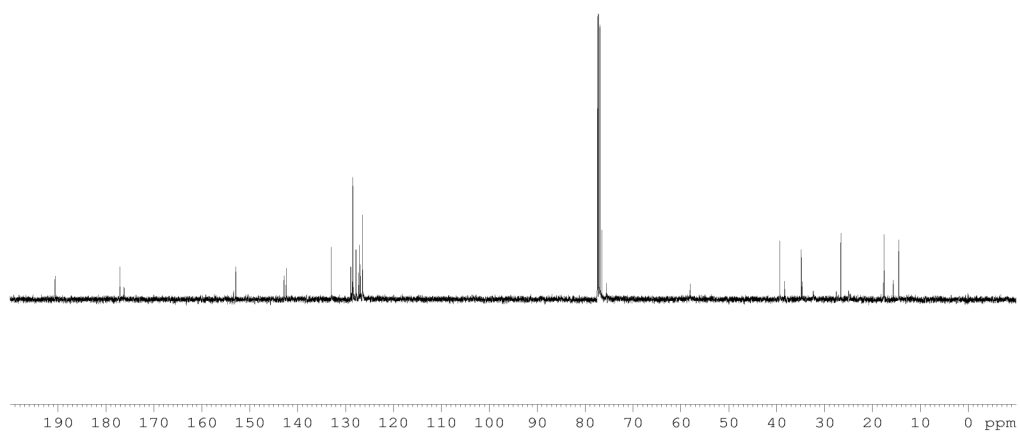

$^{13}\text{C}$  NMR (125 MHz,  $\text{CDCl}_3$ ) Spectrum of **8b**



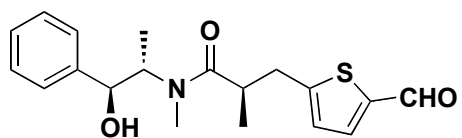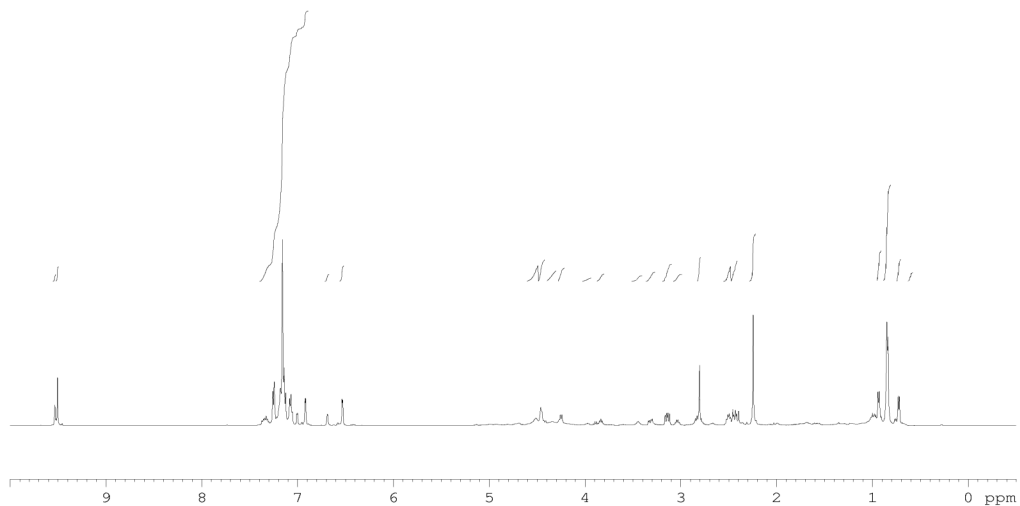

<sup>1</sup>H NMR (500 MHz, C<sub>6</sub>D<sub>6</sub>) Spectrum of **8c**

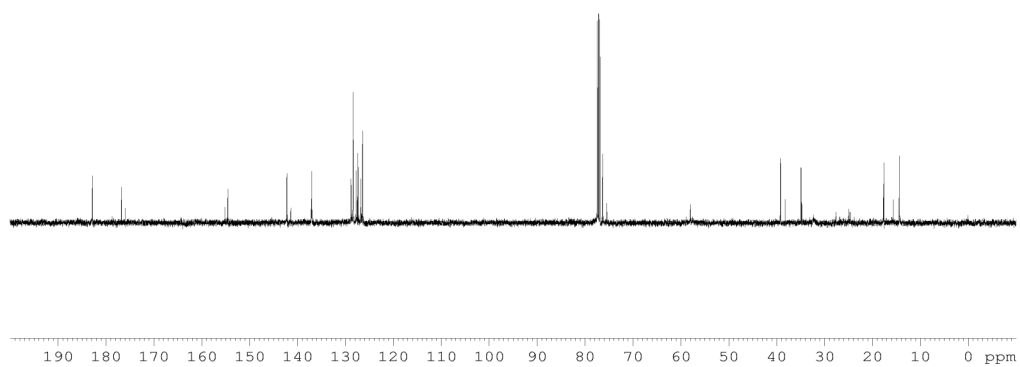

<sup>13</sup>C NMR (125 MHz, CDCl<sub>3</sub>) Spectrum of **8c**

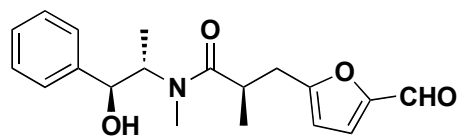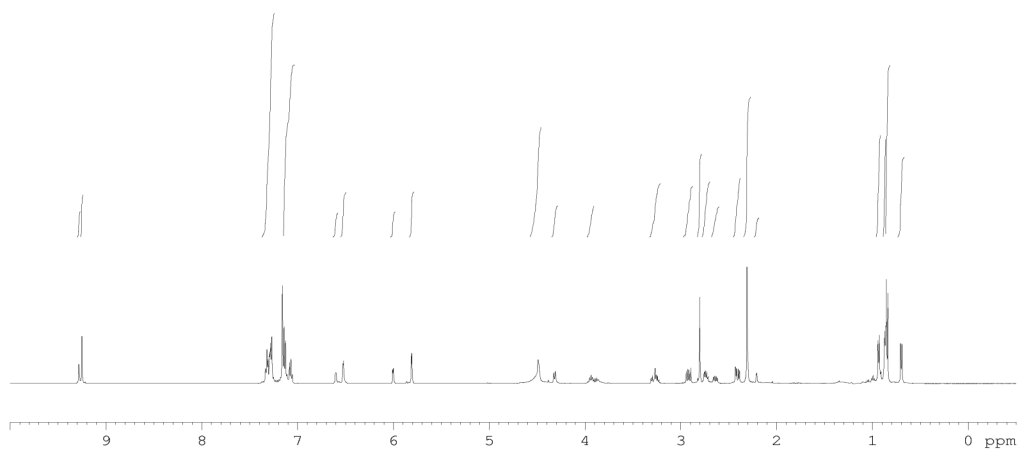

$^1\text{H}$  NMR (500 MHz,  $\text{C}_6\text{D}_6$ ) Spectrum of **8d**

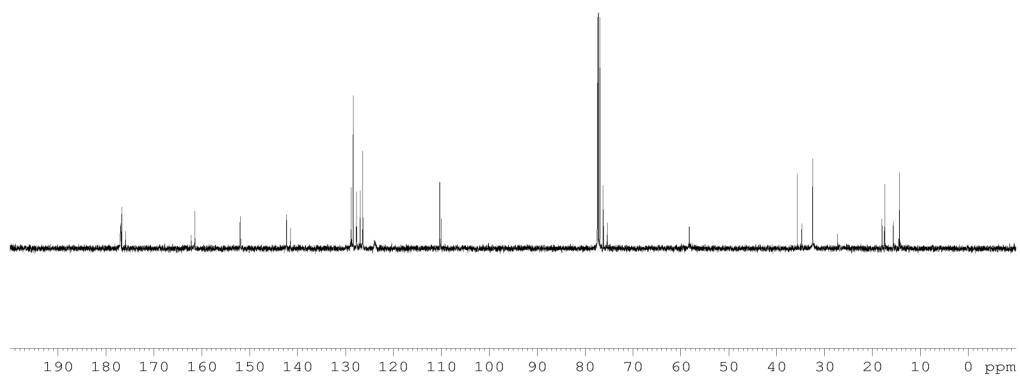

$^{13}\text{C}$  NMR (125 MHz,  $\text{CDCl}_3$ ) Spectrum of **8d**

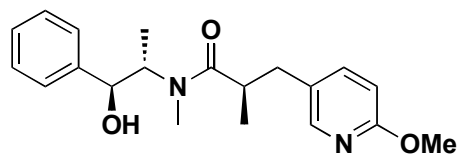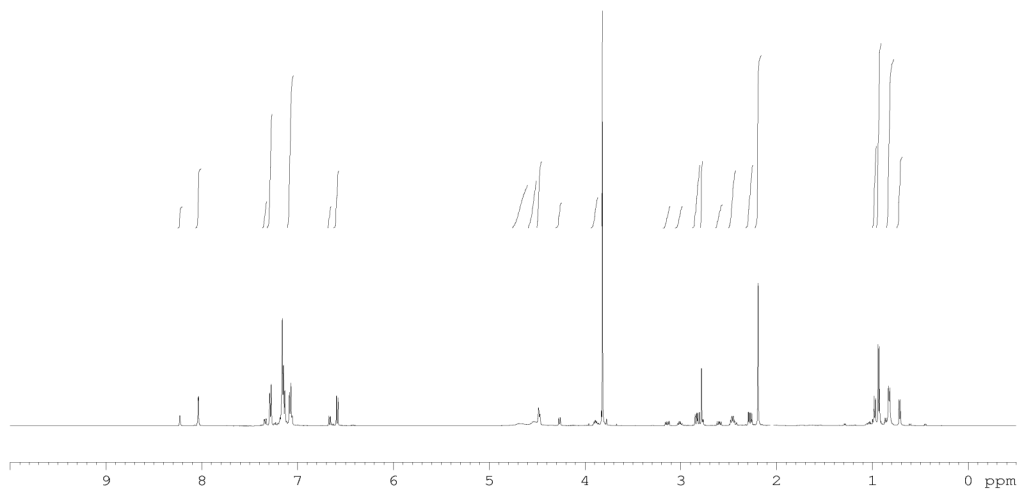

$^1\text{H}$  NMR (500 MHz,  $\text{C}_6\text{D}_6$ ) Spectrum of **8e**

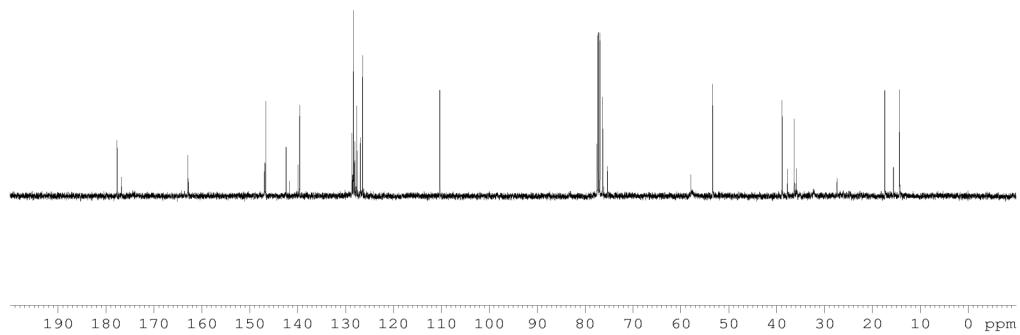

$^{13}\text{C}$  NMR (125 MHz,  $\text{CDCl}_3$ ) Spectrum of **8e**

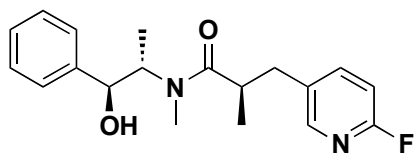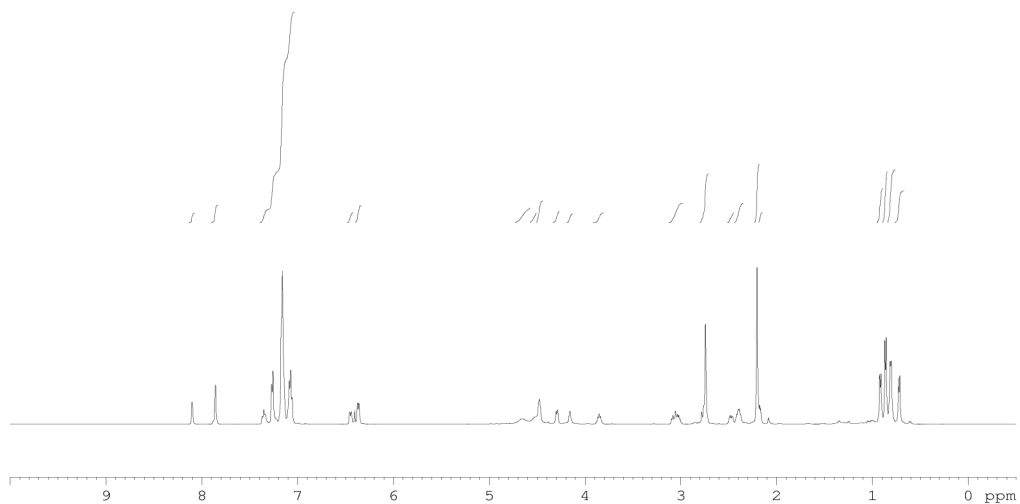

<sup>1</sup>H NMR (500 MHz, C<sub>6</sub>D<sub>6</sub>) Spectrum of **8f**

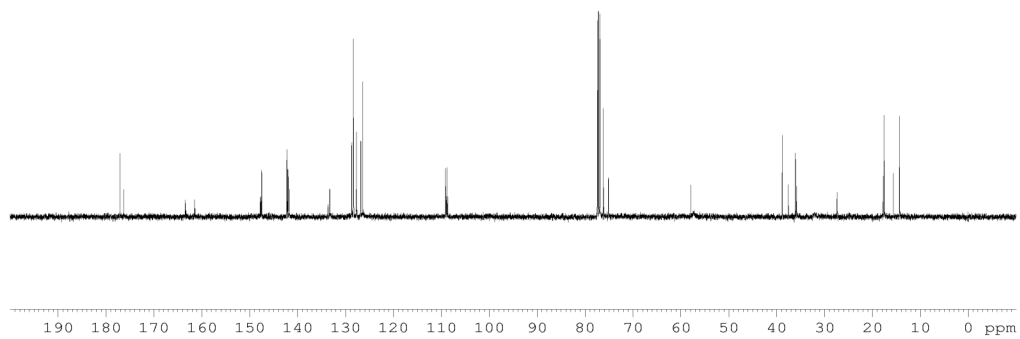

<sup>13</sup>C NMR (125 MHz, CDCl<sub>3</sub>) Spectrum of **8f**

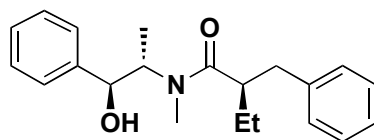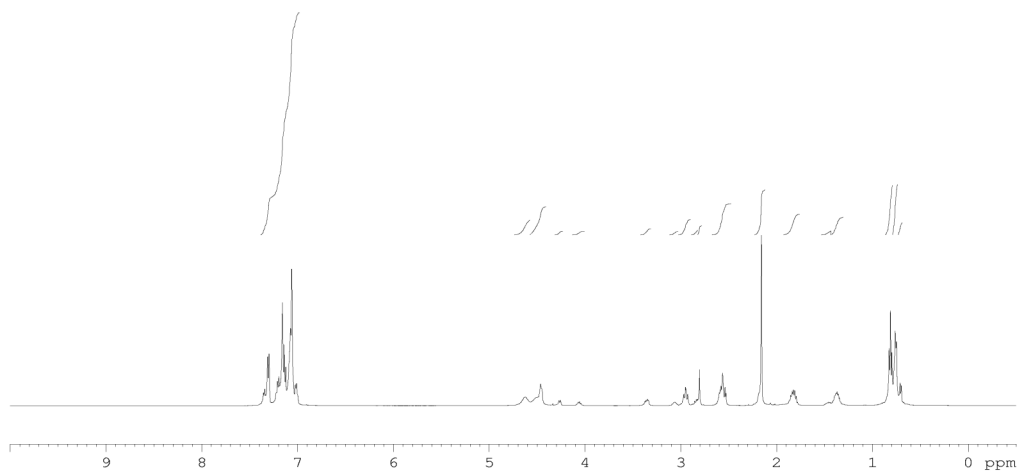

$^1\text{H}$  NMR (500 MHz,  $\text{C}_6\text{D}_6$ ) Spectrum of **9a**

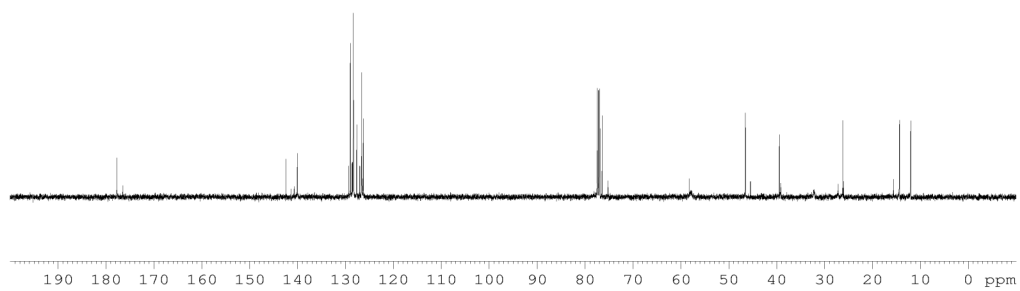

$^{13}\text{C}$  NMR (125 MHz,  $\text{CDCl}_3$ ) Spectrum of **9a**

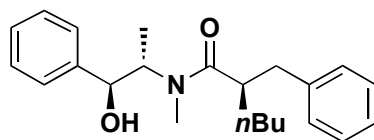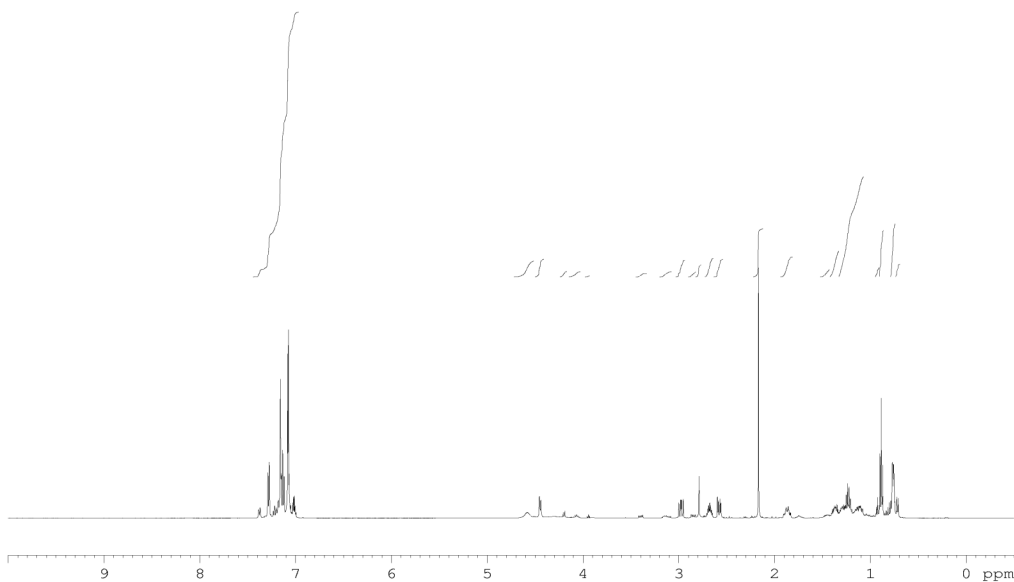

<sup>1</sup>H NMR (500 MHz, C<sub>6</sub>D<sub>6</sub>) Spectrum of **9b**

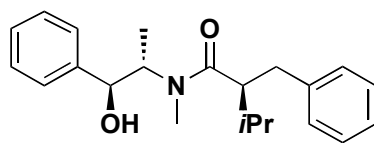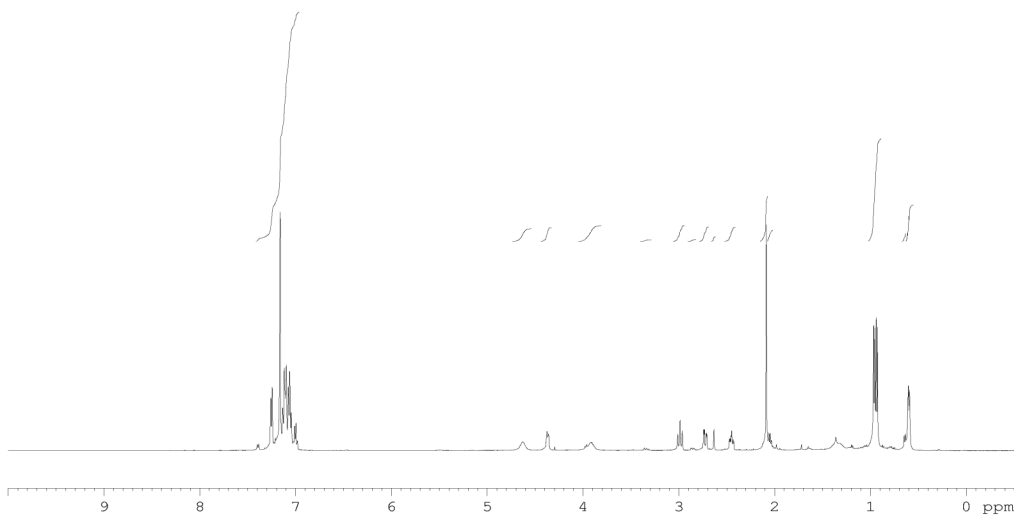

<sup>1</sup>H NMR (500 MHz, C<sub>6</sub>D<sub>6</sub>) Spectrum of **9c**

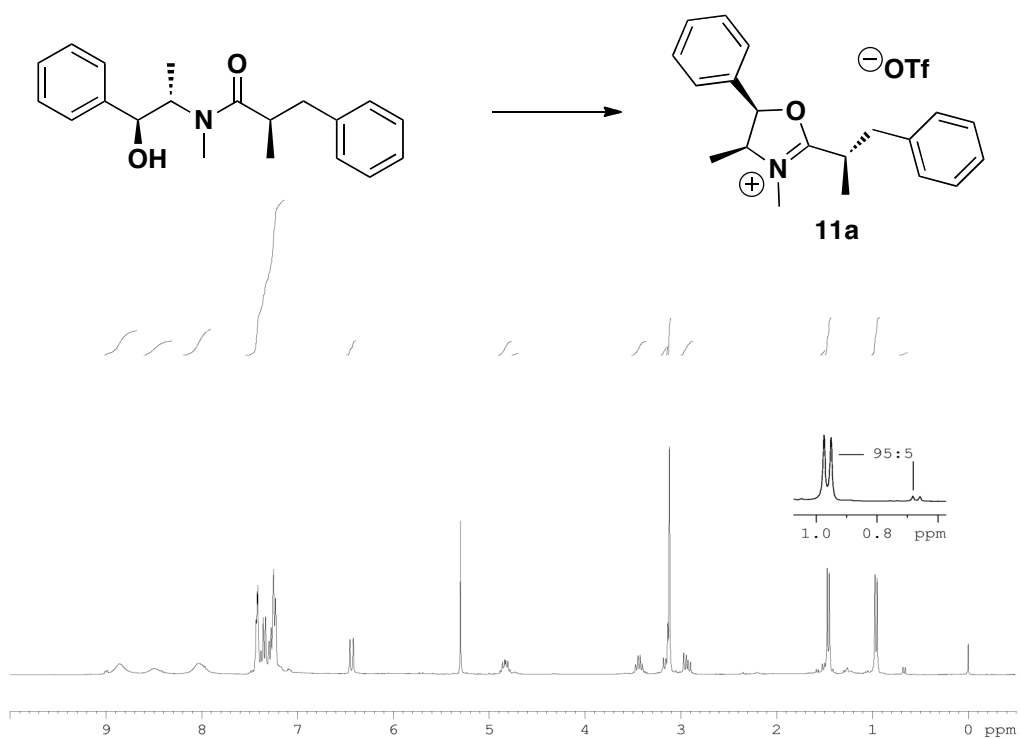

$^1\text{H}$  NMR (500 MHz,  $\text{CDCl}_3$ ) Spectrum of **11a**

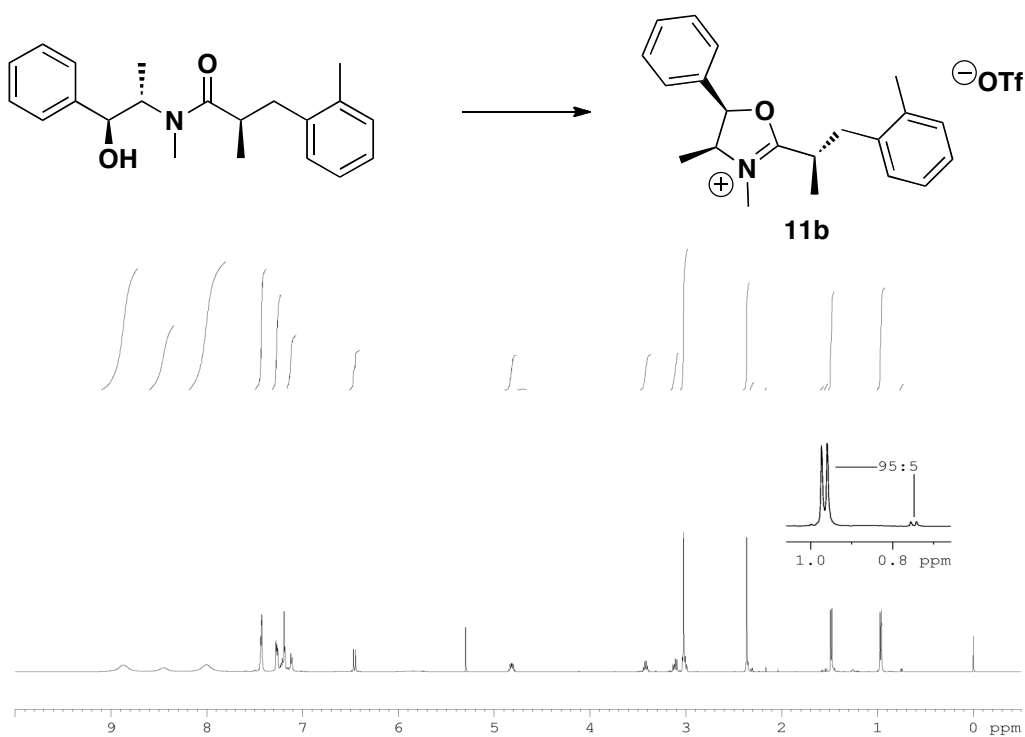

$^1\text{H}$  NMR (500 MHz,  $\text{CDCl}_3$ ) Spectrum of **11b**

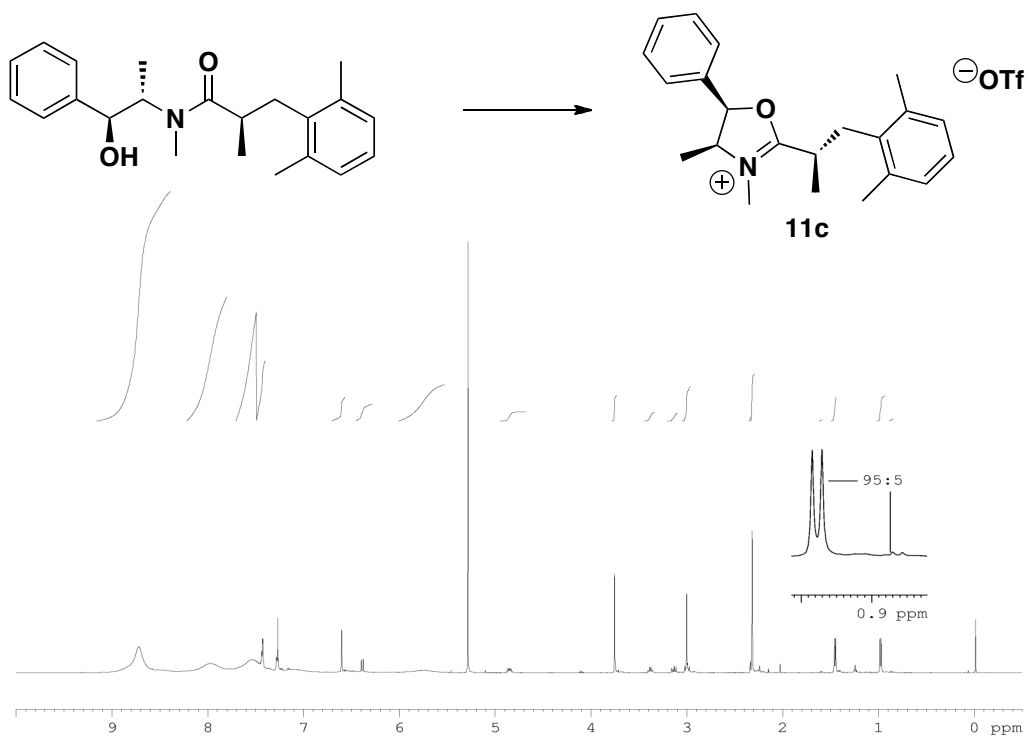

$^1\text{H}$  NMR (500 MHz,  $\text{CDCl}_3$ ) Spectrum of **11c**

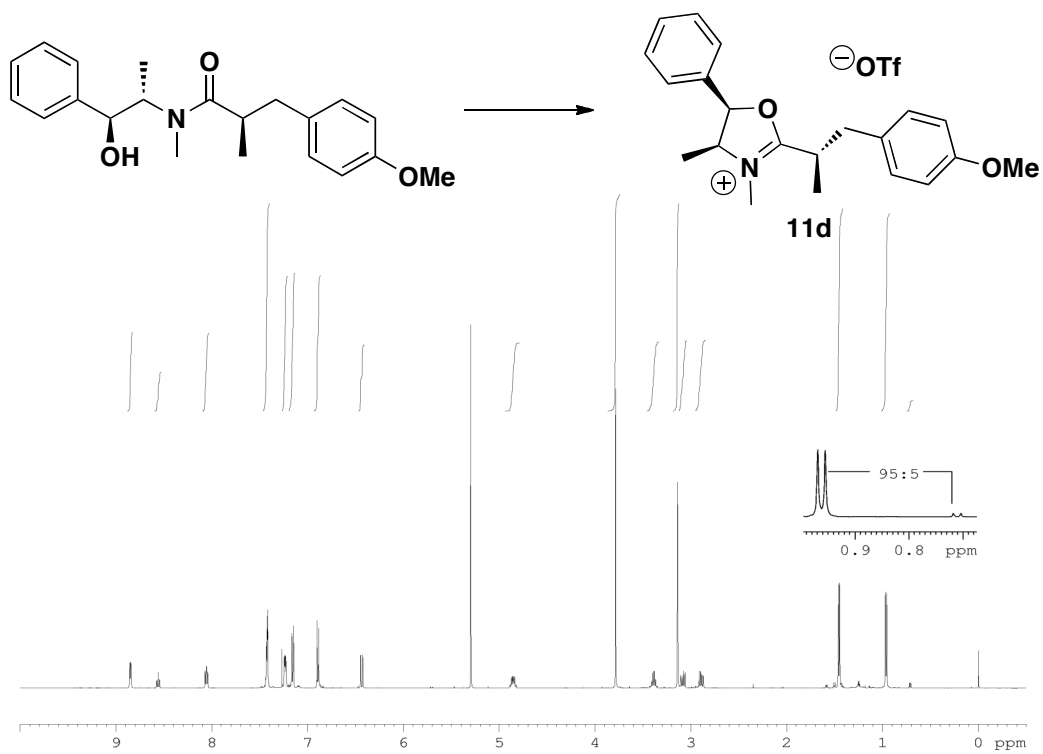

$^1\text{H}$  NMR (500 MHz,  $\text{CDCl}_3$ ) Spectrum of **11d**



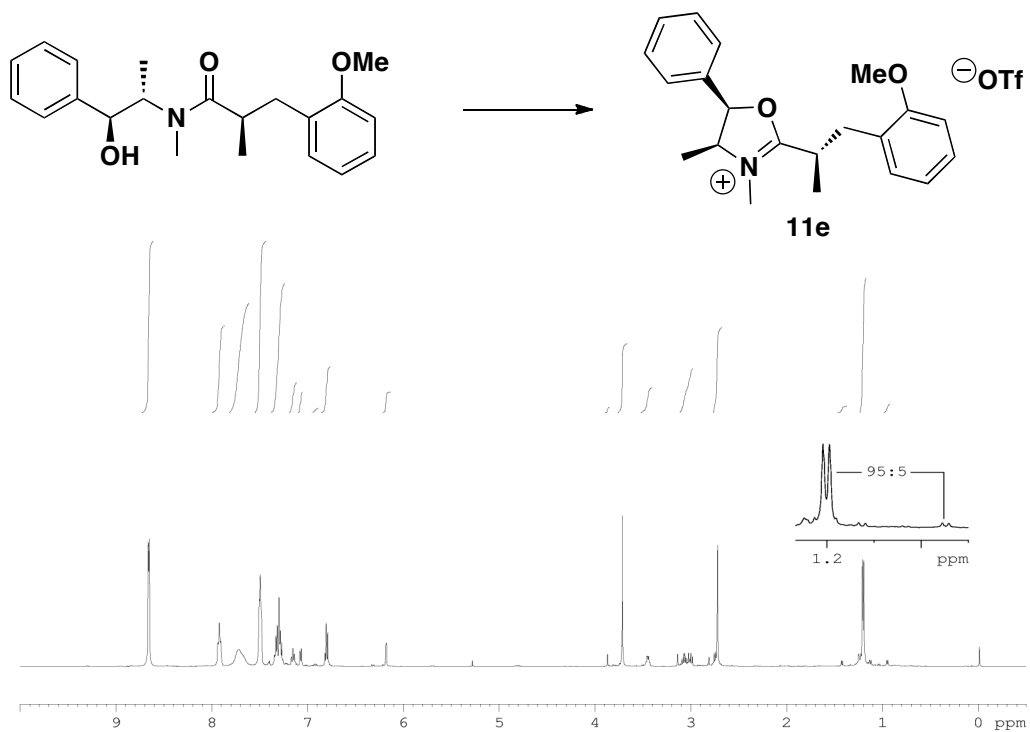

$^1\text{H}$  NMR (500 MHz,  $\text{CDCl}_3$ ) Spectrum of **11e**

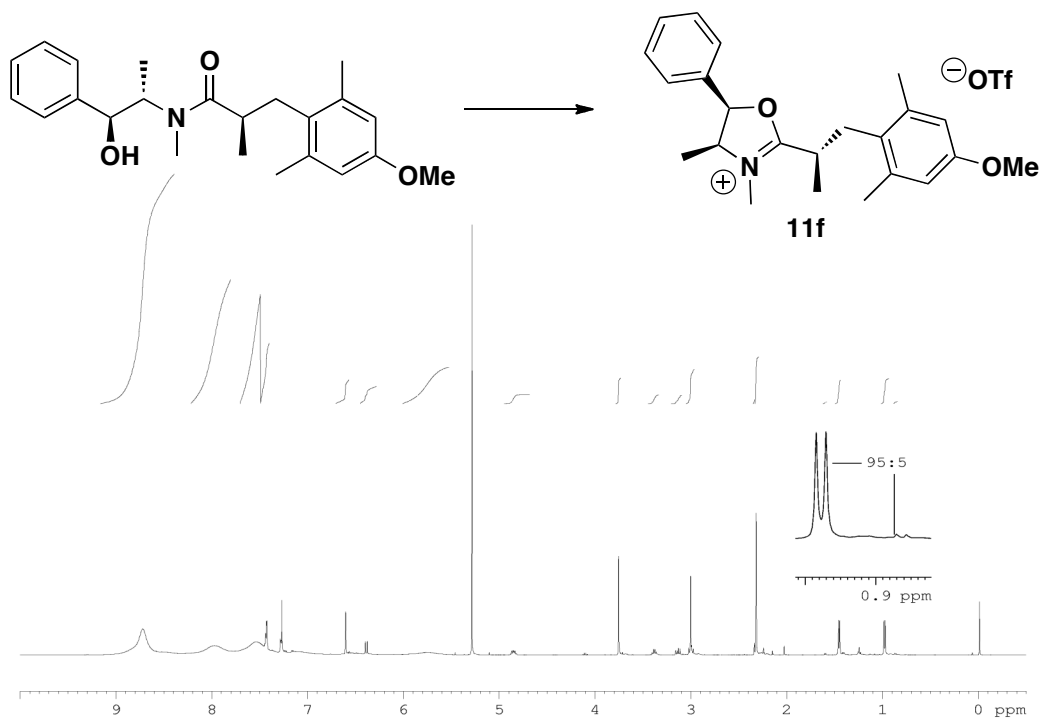

$^1\text{H}$  NMR (500 MHz,  $\text{CDCl}_3$ ) Spectrum of **11f**

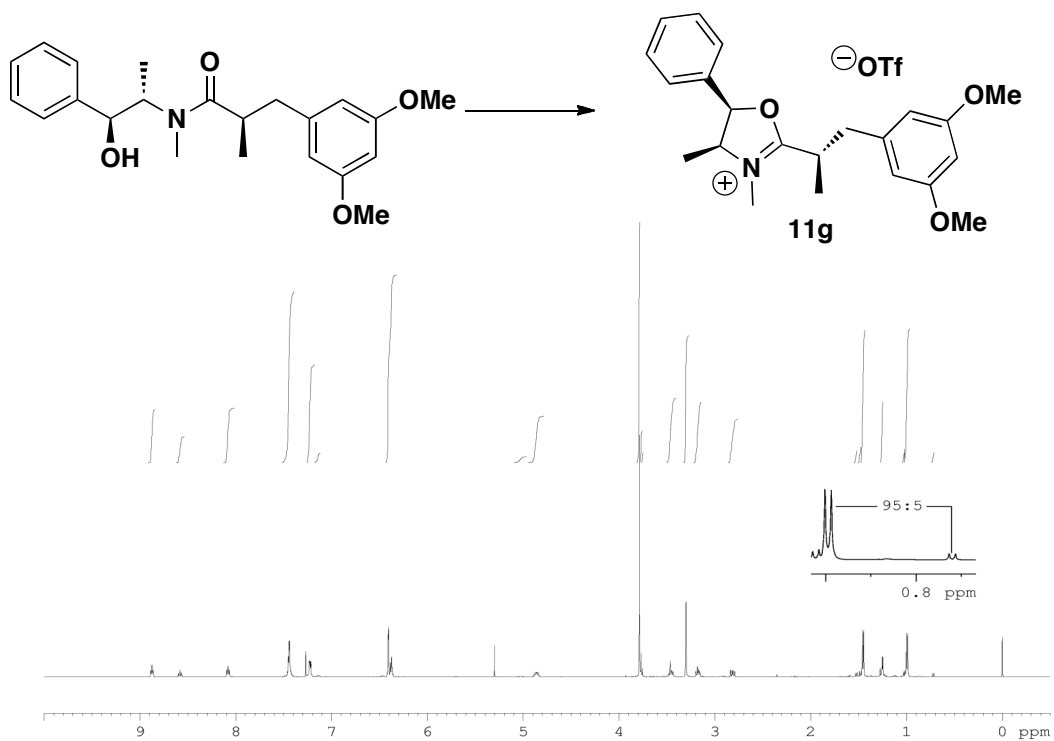

<sup>1</sup>H NMR (500 MHz, CDCl<sub>3</sub>) Spectrum of **11g**

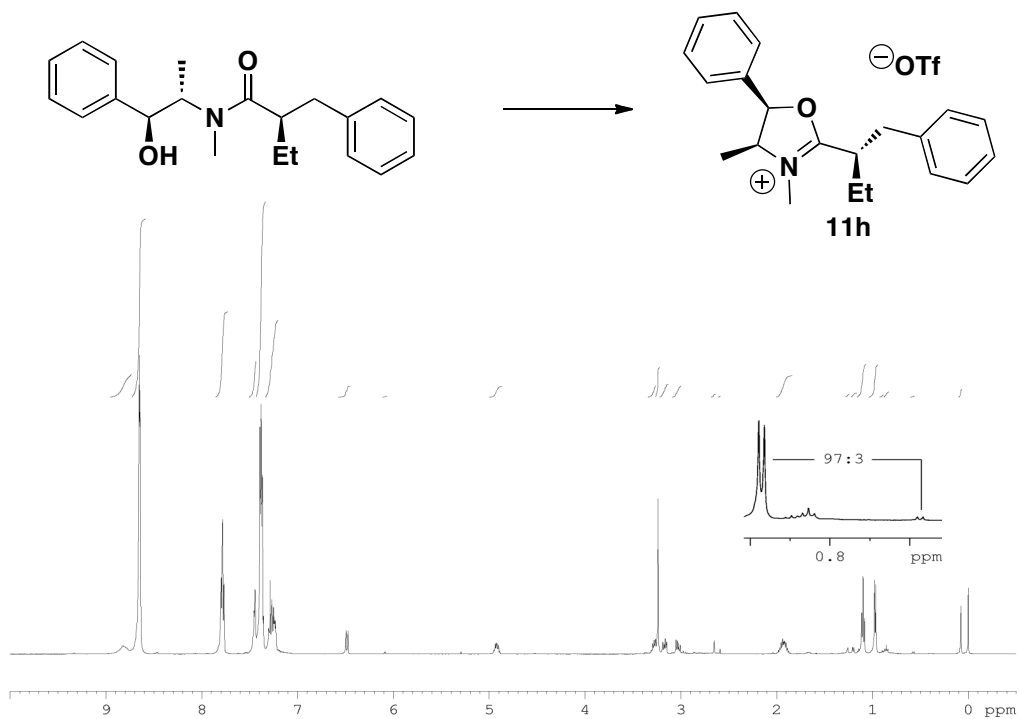

<sup>1</sup>H NMR (500 MHz, CDCl<sub>3</sub>) Spectrum of **11h**

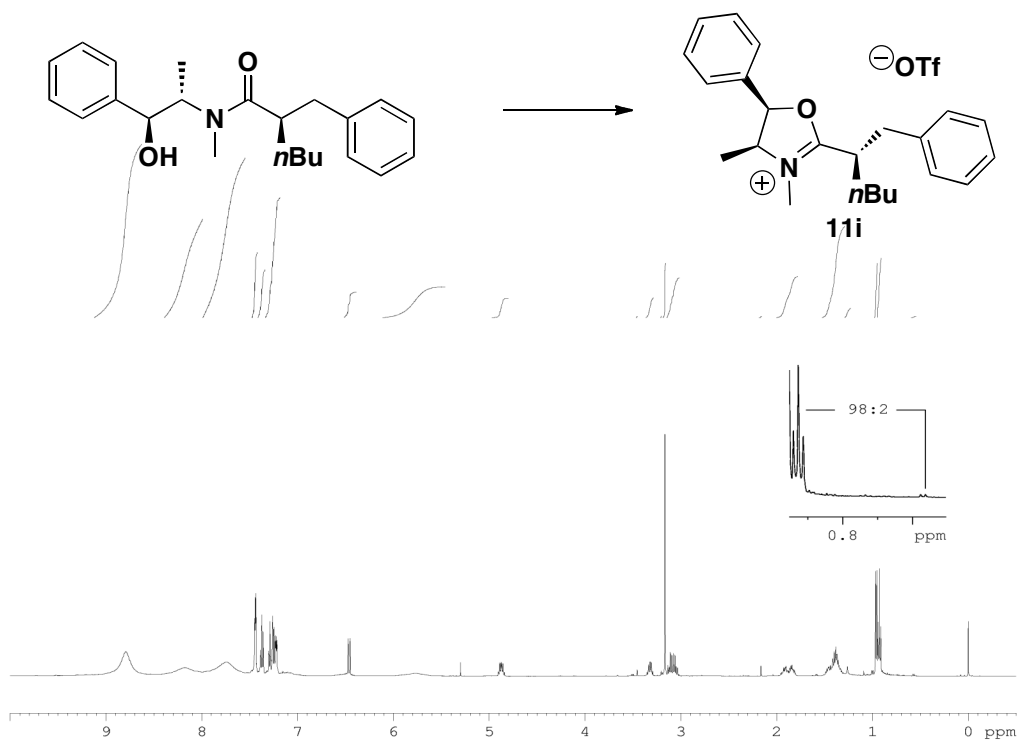

$^1\text{H}$  NMR (500 MHz,  $\text{CDCl}_3$ ) Spectrum of **11i**

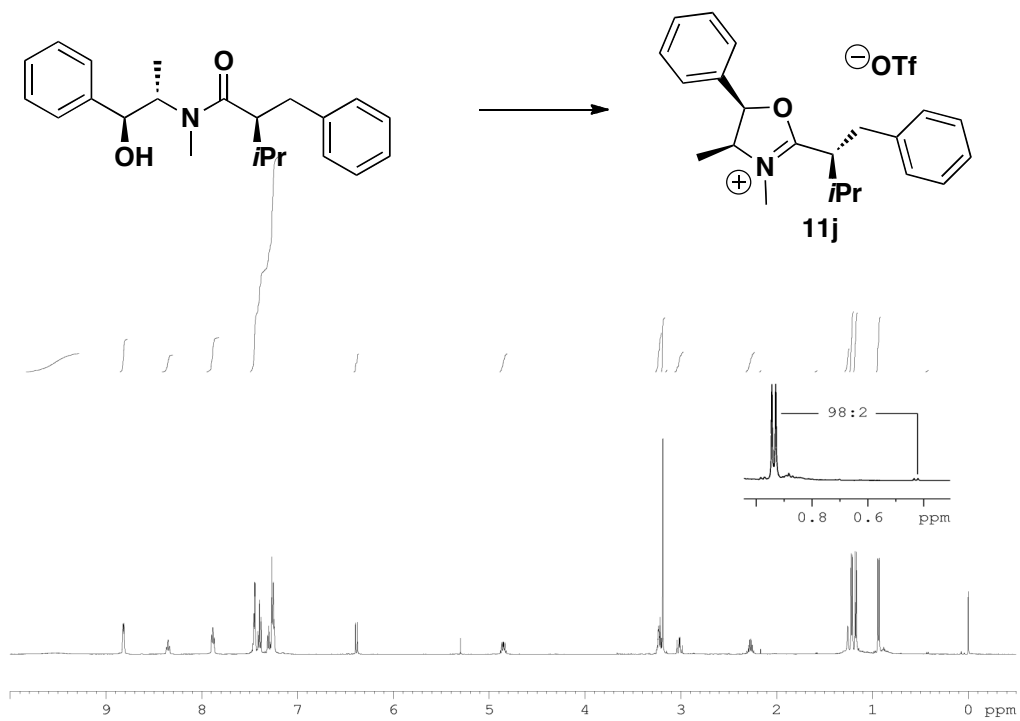

$^1\text{H}$  NMR (500 MHz,  $\text{CDCl}_3$ ) Spectrum of **11j**
